# Unified AI framework to uncover deep interrelationships between gene expression and Alzheimer's disease neuropathologies

Nicasia Beebe-Wang<sup>1</sup>, Safiye Celik<sup>2</sup>, Ethan Weinberger<sup>1</sup>, Pascal Sturmfels<sup>1</sup>, Philip L. De Jager<sup>3</sup>,  
Sara Mostafavi<sup>1,4,\*</sup> and Su-In Lee<sup>1,\*</sup>

<sup>1</sup> Paul G. Allen School of Computer Science and Engineering, University of Washington, WA, Seattle, USA.

<sup>2</sup> Benevolent Artificial Intelligence, NY, USA.

<sup>3</sup> Center for Translational and Computational Neuroimmunology, Department of Neurology, Columbia University Medical Center, New York, NY, USA.

<sup>4</sup> Department of Statistics, University of British Columbia, BC, Canada.

\* These authors contributed equally to this work.

## ABSTRACT

Deep neural networks offer a promising approach for capturing complex, non-linear relationships among variables. Because they require immense sample sizes, their potential has yet to be fully tapped for understanding complex relationships between gene expression and human phenotypes. Encouragingly, a growing number of diseases are being studied through consortium efforts. Here we introduce a new analysis framework, namely MD-AD (**M**ulti-task **D**eep learning for **A**lzheimer's **D**isease neuropathology), which leverages an unexpected synergy between deep neural networks and multi-cohort settings. In these settings, true joint analysis can be stymied using conventional statistical methods, which (1) require "harmonized" phenotypes (i.e., measured in a highly consistent manner) and (2) tend to capture cohort-level variations, obscuring the subtler true disease signals. Instead, MD-AD incorporates multiple related phenotypes sparsely measured across cohorts, and learns complex, non-linear interactions between genes and phenotypes not discovered using conventional expression data analysis methods (e.g., component analysis and module detection), enabling the model to capture subtler signals than cohort-level variations. Applied to the largest available collection of brain samples (N=1,758), we demonstrate that MD-AD learns a truly generalizable relationship between gene expression program and AD-related neuropathology. The learned program generalizes in several important ways, including recapitulation of the disease progress in animal models and across tissue types, and we show that such generalizability is not achieved by previous statistical paradigms. Its ability to identify genes with high non-linear relevance to neuropathology enabled us to identify a sex-specific relationship between neuropathology and immune response across microglia, providing a nuanced context for association between inflammatory genes and AD.

## 37 INTRODUCTION

38 Alzheimer's disease (AD), the sixth leading cause of death in the United States, is a degenerative brain  
39 condition with no known treatment to prevent, cure, or delay its progression. Primary challenges to  
40 treating and preventing AD include *extensive heterogeneity* in the clinicopathologic state of older  
41 individuals<sup>1</sup> and *limited knowledge* about genetic and molecular drivers and suppressors of AD-related  
42 (amyloid and tau) proteinopathies and AD dementia<sup>2</sup>. Recent efforts to identify molecular mechanisms  
43 underlying AD and its progression focus on two complimentary approaches. First, the assembly of large  
44 genome-wide association studies (GWAS) (N>100K subjects) enabled case/control analyses of genetic  
45 variants correlated with a clinical diagnosis of AD. Interestingly, some identified variants have implicated  
46 tau protein binding, amyloid precursor protein (APP) metabolism or immune pathways that play a role in  
47 their aggregation and/or uptake<sup>3-5</sup>. These results reinforce the need for detailed investigations of the  
48 drivers of neuropathological variation across individuals. Second, moderate-scale post-mortem  
49 transcriptomic studies have investigated molecular correlates of a richer set of phenotypic and  
50 neuropathological outcomes<sup>6-9</sup>. Early work in this domain examined pairwise correlations among gene  
51 expression levels and AD related traits<sup>10</sup> or a diagnosis of AD<sup>11</sup>. More recent attempts have focused on  
52 learning statistical dependencies among gene expression using AD expression data collected from one  
53 cohort, in order to infer gene regulatory networks<sup>7</sup> or co-expressed modules<sup>6</sup> associated with AD related  
54 phenotypes (see Supplementary Methods for details). The relative scarcity of brain gene expression data  
55 collected from each cohort has posed a challenge to the use of complex models, such as deep neural  
56 networks.

57 The collection of postmortem brain RNA-sequencing datasets, assembled by the AMP-AD (**A**ccelerating  
58 **M**edicines **P**artnership **A**lzheimer's **D**isease) consortium, provides a unique opportunity to combine  
59 multiple data sets in an integrative analysis. Previous work has applied existing co-expression methods to  
60 each dataset and used consensus methods to identify consistent gene expression modules across datasets<sup>9</sup>.  
61 To our knowledge, there has not yet been a *unified* approach to learn a single joint model that  
62 incorporates multiple AMP-AD datasets, which would enable the use of all samples to capture intricate  
63 interactions between gene expression levels and phenotypes. A unified approach has been hindered by:  
64 (1) the need for "harmonized" phenotypes consistently measured across datasets, and (2) the limitation of  
65 current analysis methods that focus on linear relationships between variables (e.g., module analysis<sup>9</sup>)  
66 which tend to capture broader patterns in gene expression that often correspond to cohort-level variations,  
67 and to consequently obscure true disease signals.

68 Here, we develop MD-AD (**M**ulti-task **D**eep learning for **A**lzheimer's **D**isease neuropathology), a *unified*  
69 *framework for analyzing heterogeneous AD datasets* to improve our understanding of expression basis for  
70 AD neuropathology (**Figure 1a-d**). Unlike previous approaches, MD-AD learns a single neural network  
71 by jointly modeling multiple neuropathological measures of AD (**Figure 1a**), and hence it incorporates a  
72 large collection of postmortem brain RNA-sequencing datasets. The combined AMP-AD dataset contains  
73 1,758 samples distributed across 9 brain regions which are labeled with up to six neuropathological  
74 outcomes that are *sparsely* available across cohorts (**Figure 1e**). This *unified* framework has key  
75 advantages over separately trained models. First, MD-AD can accommodate sparsely labeled data, which  
76 is a natural characteristic of datasets aggregated through consortium efforts (**Figure 1e**). Even if different  
77 phenotypes only partially overlap in the measured samples, each sample contributes to the training of both  
78 phenotype-specific and shared layers (**Figure 1a**). Predicting multiple phenotypes at once biases shared  
79 network layers to capture relevant features of these AD phenotypes at the same time. This is of critical

80 importance: each phenotype represents a *different* noisy measurement of the same underlying true  
81 biological process, and, as we demonstrate, joint training allows MD-AD to average out the noise to  
82 extract the true hidden signal. Additionally, the increased sample size enables MD-AD to capture  
83 complex non-linear interactions between genes and phenotypes. Multi-layer perceptrons (MLPs) offer  
84 another powerful approach for directly capturing complex relations between gene expression and a  
85 phenotype. However, training separate MLPs for each phenotype (**Supplementary Figure 1a**) has limited  
86 scope: it can utilize only the samples measured for a specific phenotype, and it cannot share information  
87 across related phenotypes. We demonstrate that these advantages improve MD-AD prediction accuracy,  
88 enabling its predictions to generalize across species and tissue types (**Figure 1b**).

89 MD-AD's ability to capture complex non-linear relationships provides an opportunity to gain new  
90 insights into the expression basis of AD neuropathology, which were not identified by previous  
91 approaches. However, an obvious drawback of deep neural networks is their black-box nature, making it  
92 difficult to biologically interpret gene-phenotype associations. This paper presents two ways to address  
93 this challenge. First, MD-AD adopts a well-known feature attribution method<sup>12</sup>, which quantifies how  
94 much each input variable (here, gene expression level) contributes to a prediction (here, a  
95 neuropathological phenotype) to identify genes and pathways relevant to each neuropathological  
96 phenotype (**Figure 1d**). Second, because MD-AD is a deep learning model, we can interpret its  
97 intermediate layers as biologically relevant *high-level feature representation* of gene expression levels  
98 and its predictions as the amalgamation of AD-specific molecular markers. The last shared layer of MD-  
99 AD can be viewed as *a supervised embedding* influenced by each neuropathological phenotype used  
100 during training. Thus, by interpreting this layer's embedding, we gain understanding of model  
101 components and high-level dependencies between expression and neuropathology (**Figure 1c**). As the  
102 first deep learning attempt to relate gene expression to multiple AD neuropathological phenotypes, we  
103 identify globally important genes not previously implicated in linear methods and perform sex-specific  
104 analyses to explore implicitly captured non-linear effects among genes and AD severity predictions.

105 In sum, our new MD-AD framework makes the following contributions: (1) It is able to *effectively impute*  
106 *accurate AD neuropathological phenotype predictions* from broad compendia of heterogeneous brain  
107 gene expression data; (2) it produces learned representations that are more robust than separately learned  
108 models, improving *generalizability to other datasets, species, and even tissue types*; (3) it provides an  
109 *improved understanding of inter-relationships* among molecular drivers of AD neuropathology that is  
110 missed by linear methods; and (4) from a biological standpoint, MD-AD highlights a sex-specific  
111 relationship between microglial immune activation and neuropathology.

## 112 **RESULTS**

### 113 **MD-AD provides a unified framework to learn a single model of multiple neuropathological** 114 **phenotypes across multiple cohort datasets**

115 The MD-AD model takes as input brain gene expression profiles and simultaneously predicts several AD-  
116 related neuropathological phenotypes (**Figure 1a**). In particular, the model is trained on expression data  
117 from the ROSMAP<sup>6,13,14</sup>, ACT<sup>15</sup> and MSBB<sup>16</sup> cohort studies, which together have 1,758 gene expression  
118 profiles for 925 distinct individuals. These data are normalized for study batch (Supplementary Methods,  
119 **Supplementary Figure 1b-c**)<sup>17</sup>. As shown in **Figure 1a**, the MD-AD model simultaneously predicts six  
120 AD-related neuropathological phenotypes: three related to amyloid plaques and three to tau tangles. The  
121 former include: (1) **A $\beta$  IHC**: amyloid- $\beta$  protein density via immunohistochemistry, (2) **NPs**: neuritic

122 amyloid plaque counts from stained slides, and (3) **CERAD score**: a semi-quantitative measure of  
123 neuritic plaque severity<sup>18</sup>. The latter include: (4)  **$\tau$  IHC**: abnormally phosphorylated  $\tau$  protein density via  
124 immunohistochemistry, (5) **tangles**: neurofibrillary tangle counts from silver stained slides, and (6)  
125 **Braak stage**: a semi-quantitative measure of neurofibrillary tangle pathology<sup>19</sup>. Thus, MD-AD generates  
126 six highly related predictions simultaneously and covers each of the two main hallmarks of AD  
127 neuropathology (plaques and tangles) at three levels of granularity. The three studies measure partially  
128 overlapping subsets of the six phenotypes described above (**Figure 1e** and **Table 1**), so across our  
129 combined dataset some variables are sparsely labeled, although Braak and CERAD are each measured in  
130 all studies (**Figure 1e**). During training, the MD-AD model continually updates model parameters via  
131 backpropagation, but only for labeled phenotypes from a given sample. Thus, for each phenotype for a  
132 given sample, MD-AD updates parameters from associated separate layers along with all shared layers.  
133 This allows us to train a unified model from all available samples despite having many missing labels.

134

135 **MD-AD accurately predicts neuropathology from gene expression, and its predictions are**  
136 **generalizable to external datasets.**

137 In the first pass at model evaluation, we assessed MD-AD using standard five-fold cross-validation (CV),  
138 quantifying the average mean squared error (MSE) on the test samples (**Figure 2a** and **Supplementary**  
139 **Figure 1d**). We compared MD-AD to two simpler baseline models: a regularized linear model (ridge  
140 regression) and a single output deep neural network (MLP). These alternative results helped us assess two  
141 significant components of the MD-AD model: (1) its non-linear modeling of the relation between gene  
142 expression and neuropathological phenotypes, and (2) its joint modeling of multiple related  
143 neuropathological phenotypes. In general, MLP models outperformed linear models, highlighting a  
144 general advantage of deep learning over a linear approach. Furthermore, compared to the MLP models,  
145 MD-AD showed MSE reductions of 7% for CERAD score, 13% for Braak stage, 7% for NPs, 25% for  
146 tangles, 10% for A $\beta$  immunohistochemistry (IHC), and 14% for  $\tau$  IHC (**Figure 2a**). Interestingly, MD-  
147 AD showed its largest performance gain for the tangles variable, which also had the most missing labels  
148 (**Figure 1e**), highlighting a specific advantage of joint learning for sparsely labeled data.

149 Because our model was trained and evaluated on ACT, MSBB, and ROSMAP datasets, we assessed  
150 whether residual (uncorrected) batch effects affected performance. To do so, we performed additional  
151 validation experiments by leaving out specific datasets during training and then evaluating their  
152 performance for MD-AD trained on the other datasets (**Figure 2b**, **Supplementary Figure 2a**). We  
153 evaluated MSE performance for ROSMAP alone since it was the only dataset with all six phenotype  
154 labels; further, by evaluating a single dataset's performance, we can identify the influence of adding  
155 "external" data. We make several observations from this analysis. First, as one may expect, larger training  
156 samples always helped reducing prediction error on test samples from the unseen study (ROSMAP), and  
157 especially so when datasets from multiple cohorts were included in the training (i.e., ACT and MSBB)  
158 (circular markers in **Figure 2b**). Second, when considering the effects of augmenting ROSMAP data with  
159 other datasets during training (diamond markers in **Figure 2b**), we observed that errors initially increased  
160 when adding a new dataset but tended to decline as more datasets were included in training. This may  
161 result from small differences in labeling conventions across studies, or batch effects in gene expression  
162 data. However, we find that the benefits of additional heterogeneous samples ultimately outweigh  
163 potential batch effects in prediction performance. Third, interestingly, we observed that adding new  
164 samples improved performance for a phenotype even when the phenotype in question was not measured

165 in the new samples (see gray footprints around markers in **Figure 2b**). This suggests that the shared  
166 representation learned by MD-AD captures the underlying biological signal common across noisy  
167 neuropathological phenotype measurements.

168 Next, as the ultimate test of MD-AD out-of-sample predictions, we assessed performance on three  
169 independent studies never seen by the model: Mount Sinai Brain Bank Microarray (MSBB; N=1,053),  
170 Harvard Brain Tissue Resource Center (HBTRC; N=460), and Mayo Clinic Brain Bank (N=323).  
171 Because these datasets provide a sparse set of neuropathological labels, we evaluated whether MD-AD  
172 predictions were consistent with the (binary) neuropathological diagnosis of AD by calculating “MD-AD  
173 neuropathology scores” for each sample (by averaging ranked predictions across the six phenotypes). For  
174 comparison with other methods, we also generated “neuropathology score” predictions for our baseline  
175 models.

176 As shown in **Figure 2c**, we observed a highly significant difference in predicted neuropathology scores  
177 between AD cases and controls (two-sided t-test:  $t=22.98$ ,  $p<0.001$ ), and these differences were more  
178 pronounced for MD-AD compared to the other baseline models (results split by dataset are shown in  
179 **Supplementary Figure 3a**). More convincingly, when split by age group (**Figure 2c** right panel), we  
180 consistently observed a significant increase in predicted neuropathology for AD vs control samples, but  
181 the difference was largest in individuals under 75 (between-groups  $p$ -values are shown in **Supplementary**  
182 **Figure 3b**). This is consistent with the observation that aging individuals who are cognitively non-  
183 impaired often have substantial neuropathology<sup>15</sup>. Together, these results indicate that MD-AD can  
184 identify generalizable gene expression patterns that are predictive of AD-related neuropathology across  
185 varied age ranges, and thus it is unlikely that these patterns merely capture normal aging.

186

### 187 **Complex transcriptomic predictors of neuropathology are conserved across species.**

188 We next evaluated how well MD-AD’s learned expression patterns predictive of neuropathology  
189 recapitulated neuropathology in mouse models. We applied MD-AD trained on human datasets to make  
190 predictions based on brain (hippocampal and cortical) gene expression data from 30 TASTPM mice that  
191 harbored double transgenic mutation in APP and PSEN1 and compared the predictions to those from 76  
192 wild type mice<sup>20</sup>. We focused on TASTPM mice because they were found to robustly exhibit early signs  
193 of amyloid aggregation and plaque formation. As above, to simplify MD-AD predictions, we then  
194 predicted all six neuropathological phenotypes via MD-AD and generated an aggregate “neuropathology  
195 score” per mouse (as described in Supplementary Methods).

196 As shown in **Figure 2d**, MD-AD predicted significantly higher neuropathology scores for the  
197 homozygous cross TASTPM than wild type mice (two-sided t-test:  $t=3.45$ ,  $p<.001$ ). The MLP baseline  
198 method also produced significant differences between homozygous and wild type mice, but less  
199 effectively ( $t=3.01$ ,  $p<.01$ ). Furthermore, there was a stronger trend for higher predictions in the  
200 heterozygous TASTPM cross (N=32) than wild type mice for MD-AD ( $t=1.38$ ,  $p=.17$ ) compared to MLP  
201 baselines ( $p=.38$ ). Interestingly, our linear baseline tended to predict lower average neuropathology levels  
202 for these AD strains than wild type, suggesting that a linear approach may fail to effectively model cross-  
203 species AD signal. None of the models produced significantly different neuropathology scores between  
204 other strains (i.e., TPM, TAS10, Tau) and wild type mice, consistent with lower neuropathological burden  
205 in these models (data not shown). Notably, when we stratified the samples by age, we found that MD-AD  
206 tended to predict higher neuropathology in older mice regardless of strain), but in particular it made

207 higher neuropathology predictions for homozygous than heterozygous crosses followed by wild type mice  
208 (many of these groups differed significantly from one another, as shown in **Supplementary Figure 3c**).  
209 Overall, these results indicate that MD-AD learns a generalizable expression pattern associated with  
210 neuropathology that is conserved across species.

211

## 212 **Deep transcriptomic signatures of neuropathology are predictive of AD dementia**

213 Hidden layers of a deep neural network capture the embedding of input examples in the derived feature  
214 space, yielding a “hidden” representation that is predictive of the outcome(s) of interest. In this case, the  
215 last shared layer of MD-AD (**Figure 1a, c**) captures a latent (lower) dimensional representation of gene  
216 expression that is predictive of multiple types of neuropathology related to AD. To derive the biological  
217 basis of MD-AD predictions, we first visualized this embedding space in 2D using the t-SNE algorithm  
218 (**Figure 3a**)<sup>21</sup> (to improve stability, we used a consensus approach over many re-trainings of the MD-AD  
219 model, **Supplementary Figure 4a**). We observed that the representation in this space was impressively  
220 coherent with respect to all six neuropathological variables: individuals with similar overall  
221 neuropathology severities had similar MD-AD consensus representations for their gene expression  
222 profiles, and this observation was true for external test samples not used for model training (**Figure 3d-e**,  
223 **Supplementary Figure 3d**). This was remarkable because representations derived by unsupervised  
224 dimensionality reduction (e.g., K-means or PCA) failed to capture the components of gene expression  
225 relevant to neuropathology, and mainly captured batch effects, while those derived by standard single  
226 output MLP tended to overfit to each neuropathology variable and were incoherent *across*  
227 neuropathological measurements (**Figure 3c** and **Supplementary Figure 5**).

228 Next, we evaluated whether the MD-AD embedding can go beyond neuropathology to also capture the  
229 molecular manifestation of AD dementia. In particular, we considered three “higher-level” phenotype  
230 variables: AD dementia (a *clinical* diagnosis of AD), assessment of cognitive function, and assessment of  
231 AD duration. We then correlated the latent representation captured by the hidden nodes in the last shared  
232 layer with each of these three higher-level phenotypes. As shown in **Figure 3b**, we found that MD-AD  
233 consistently produced nodes that were significantly correlated with high-level AD phenotypes; using  
234 paired *t*-tests, these correlations often outperformed nodes from our MLPs and always outperformed  
235 unsupervised methods and module-based approaches ( $p < .05$  after FDR correction over nodes). This  
236 indicates that MD-AD creates embeddings that most consistently capture the relationship between gene  
237 expression and general AD severity. Together, these results show that by jointly predicting several  
238 neuropathological phenotypes, the MD-AD framework produces a low dimensional representation of  
239 gene expression data, in the form of embedding nodes, that robustly captures a generalizable signature of  
240 AD beyond individual neuropathological phenotypes alone. Detailed annotations for MD-AD embedding  
241 nodes are provided in **Supplementary Table 2** and **Supplementary Figure 4b-d**.

242

## 243 **MD-AD reveals an interrelationship between sex and immune genes predictive of AD** 244 **neuropathology**

245 We next sought to interpret MD-AD’s learned parameters to identify the set of genes (and their  
246 relationships) that underlie its impressive predictive performance. Here, we applied the Integrated  
247 Gradient (IG) algorithm<sup>12</sup> on the fully trained model in an ensemble fashion to ensure robustness  
248 (Supplementary Methods, **Supplementary Figure 6a-b**), producing an “importance score” for each gene.

249 For a global view, we first performed functional enrichment analysis (GSEA<sup>22,23</sup>) using these importance  
250 scores, and found that relevant genes for the MD-AD model were enriched for several pathways,  
251 including metabolism of RNA and proteins, immune system, cell-to-cell communication, and signal  
252 transduction (**Figure 4b**). **Figure 4a** shows the top 50 genes and their pathway annotations where the  
253 particular relevance of immune function is even more prominent.

254 We next assessed to what extent the learned gene importance varied between a linear model and a non-  
255 linear model like MD-AD. With a simple linear correlation-based gene ranking, we found that the top 50  
256 genes had a much lower prevalence of REACTOME pathways (**Supplementary Figure 7a**). When we  
257 directly compared the top 1% of genes from MD-AD versus a correlation-based approach in **Figure 4c**,  
258 we observed that many genes belonging to metabolism, immune system, and signal transduction  
259 pathways were highly ranked for MD-AD but not for correlation-ranking. In contrast, transcription-  
260 related genes were more frequently highly ranked for correlation-based rankings compared to MD-AD's  
261 rankings. Overall, gene importance scores generated via correlations alone were enriched for a much  
262 larger set of REACTOME categories (**Supplementary Figure 7b**), whereas MD-AD pathways tended to  
263 be more specific (**Figure 5b**). We saw similar results when performing the same analyses with KEGG  
264 pathways (**Supplementary Figure 8**)<sup>24</sup>.

265 The nonlinear relationships identified by MD-AD can implicitly capture interaction effects with other  
266 covariates observable from expression data (e.g., sex, age, medication intake). Leveraging the fact that, if  
267 our model captures a nonlinear effect, then two samples with the same expression level for a single gene  
268 could receive different IG ("importance") scores by MD-AD (e.g., **Figure 5d**; in contrast, a linear model  
269 would have no vertical dispersion), we assessed whether a covariate like sex could explain discrepancy  
270 between expression levels and IG scores. (Sex is a major risk factor in AD and has prominent gene  
271 expression signatures<sup>25</sup>). Thus, we modeled each gene's IG score as a linear combination of the gene's  
272 expression, the individual's sex, and the interaction between them to identify sex-interacting genes  
273 relevant to AD. Of the 14,591 genes in our dataset, 6,465 showed differential MD-AD importance  
274 between sexes ( $p < 0.05$  after FDR), demonstrating that sex-specific expression effects in AD may be  
275 widespread. To confirm that genes are not sex-differential by chance, we show the distribution of sex-  
276 differential genes compared with the same analysis conducted with shuffled sex labels (**Supplementary**  
277 **Figure 9a**). However, we were particularly interested in genes with high overall MD-AD importance.  
278 When focusing on the top 100 genes with the highest MD-AD scores, we consistently observed high  
279 degrees of interaction between sex and immune system genes (as well as reproduction and hemostasis-  
280 related genes) (**Figure 5a-b**; we saw similar patterns for KEGG pathways in **Supplementary Figure 9b-**  
281 **c**).

282 We next explored specific examples of genes with high MD-AD rankings and strong interactions with sex  
283 (i.e., the six genes from the top 100 MD-AD list with the strongest interaction  $p$ -values; **Figure 5c-d**):  
284 *KNSTRN*, *C4B*, *CMTM4*, *TREM2*, *P2RY11*, and *SERPINA3*. In particular, for each of these genes, we  
285 observed high expression values associated with higher neuropathology predictions but some  
286 stratification across sexes: high expression in females led to especially high neuropathology predictions  
287 for *KNSTRN* and *P2RY11*, while the opposite was true for the other four genes. More broadly, our finding  
288 immune genes display sex-differential contributions to MD-AD scores appears to be consistent with  
289 conclusions from recent studies about sex differences in neuroinflammatory activity and the role these  
290 differences may play in neurodegenerative disorders<sup>26</sup>.

291 We note that some of our top sex-interacting genes may play important roles in immune response,  
292 particularly in microglia. *TREM2*, which is genetically implicated in AD, interacts with *CD33* (another  
293 AD susceptibility gene)<sup>27</sup>, is an important contributor in the clearance of toxic Amyloid- $\beta$  by microglia in  
294 mice<sup>28</sup>, and is correlated with A $\beta$  deposition in the human brain<sup>27</sup>. Similarly, *KNSTRN* is known to be  
295 upregulated in mouse microglial cells' early response to neurodegeneration<sup>29</sup>. These findings indicate that  
296 MD-AD may capture patterns related to sex-differential microglia activity. To explore this idea further,  
297 we obtain lists of upregulated genes from nine clusters of single cell microglial transcriptomes<sup>30</sup>, and  
298 compare them to our MD-AD gene rankings. As expected, many top MD-AD genes are upregulated in  
299 multiple microglial clusters (**Figure 6a**); correlation-based methods ranked these microglial genes less  
300 highly (**Supplementary Figure 9d**). Furthermore, genes upregulated in clusters related to stress, immune  
301 function and proliferation tended to be sex-differential in their gene importance (**Figure 6b**), further  
302 strengthening the finding that sex differences in immune response and inflammation may be an important  
303 factor in the molecular basis of age-related neuropathology.

304 To more broadly identify possible cell-type specific effects of MD-AD's important genes, we tested for  
305 the enrichment of 41 different cell type clusters (across six cell types) found by a single cell  
306 transcriptomic analysis of AD<sup>8</sup>. Here, we found an enrichment of 2 different microglia clusters, as well as  
307 astrocytes and inhibitory neuron clusters (**Figure 6c**). Hence, MD-AD's predictions of neuropathology  
308 rely on broader transcriptomic events that goes beyond microglia genes, suggesting a heterogeneity in the  
309 underlying molecular biology that is predictive of accumulation of AD-related neuropathology.

310

### 311 **Complex transcriptomic predictors learned by MD-AD are conserved across tissues.**

312 Although MD-AD was developed for brain gene expression data, we next asked whether the learned  
313 transcriptomic signatures generalize to blood. To this end, we applied our brain-trained MD-AD model to  
314 gene expression datasets from two batches of the AddNeuroMed cohort, which we called Blood1 and  
315 Blood2 (NCBI GEO database accessions GSE63060 and GSE63061, respectively; summarized in  
316 **Supplementary Table 3**)<sup>31</sup>. As shown in **Figure 7a**, MD-AD predicted significantly higher  
317 neuropathology scores for individuals with both mild cognitive impairment (MCI) (two-sided t-test:  
318  $t=7.34$ ,  $p < .001$ ) and AD dementia (two-sided t-test:  $t=5.87$ ,  $p < .001$ ) compared to cognitively normal  
319 controls (CTL). Consistent with external brain samples shown in **Figure 2d** and **2f**, MD-AD predictions  
320 tended to increase with age for cognitively normal individuals, while they were consistently significantly  
321 higher for MCI and AD individuals compared to controls for individuals under 80 years old (**Figure 7b**,  
322 **Supplementary Figure 10b**). Importantly, we noted that a linear model failed to make meaningful  
323 predictions (**Figure 7a** and **Supplementary Figure 10a**), suggesting that complex models like MD-AD  
324 have better performance in extracting the true underlying signal transferrable between tissues than linear  
325 models.

326 Next, we evaluated whether the patterns captured by the MD-AD model were consistent across training  
327 brain gene expression samples and blood. To this end, we again visualized MD-AD's learned embedding  
328 using the t-SNE algorithm (**Figure 7c**). We noted a clear difference in expression patterns between blood  
329 and brain samples (as seen by the clustering of blood samples in **Figure 7c**); however, MD-AD  
330 nevertheless produced an embedding for blood data that stratified blood samples along predicted  
331 neuropathological phenotypes in a manner highly consistent with the blood donor's cognitive status  
332 (**Figure 7c**; **Supplementary Figure 10c**). Together, these analyses indicate that jointly learning the



333 relationship among brain gene expression and several neuropathological phenotypes may allow for  
334 learned representations that span tissues. This in turn can open up new avenues for early identification of  
335 individuals at risk, and provide new clues into tissue-agnostic molecular mechanisms underlying AD  
336 dementia.

337

## 338 **DISCUSSION**

339 We introduce MD-AD, a deep neural network approach for jointly modeling the relationship between  
340 brain gene expression data and multiple sparsely labeled neuropathological phenotypes in a multi-cohort  
341 setting. By exploiting the synergy between deep learning and a multi-cohort, multi-task setting, we  
342 demonstrated that MD-AD can capture complex, non-linear feature representations that are not learned  
343 using conventional expression data analysis methods. Specifically, we observed that multi-task learning  
344 improves prediction performance over singly trained models. Adding data from different cohorts  
345 improves performance for various phenotypes, even those that lacked labels. When we extended our  
346 method to other datasets, it captured AD-related biological signals, showing that MD-AD can transfer  
347 effectively to out-of-sample, out-of-species (mouse), and even out-of-tissue (blood) datasets.

348 As a neural network framework, MD-AD's last shared layer embedding reveals high-level features of  
349 gene expression that are predictive of neuropathology according to the intermediate components of the  
350 model. As expected, due to multi-task supervision, our embedding nodes tend to relate to AD-associated  
351 neuropathology far more effectively than do standard unsupervised approaches and earlier reported  
352 (unsupervised) module-based approaches. Compared to singly task-supervised neural networks, the joint  
353 training MD-AD performs consistently provided a more stable and coherent AD-related embedding. By  
354 exploring the molecular pathways relevant to each node, we identified relevant gene sets contributing to  
355 these high-level AD-related features of gene expression.

356 Finally, we leveraged the complex relationships learned by MD-AD to refine our understanding of the  
357 molecular drivers of AD neuropathology. By interpreting genes relevant to our model's predictions, we  
358 uncovered that MD-AD relied on many genes not found in earlier linear-based methods, including several  
359 immune system genes. These findings expand the general narrative established by human genetic studies  
360 of AD and now a proteomic study of AD<sup>32</sup>; in particular, we see enrichment for complement pathway  
361 genes (**Figure 4**) which likely connect with the role of the complement receptor 1 (*CRI*) gene which  
362 harbors an AD susceptibility variant whose functional consequences remain poorly understood but do  
363 include an influence on the accumulation of neuritic plaque pathology<sup>33-36</sup>. Thus, MD-AD results  
364 converge with human genetic results to emphasize the role of complement in AD; interestingly  
365 complement protein C4B emerges as one of the top pathology-related genes that display a strong  
366 interaction with sex, with men showing a much stronger association than women (**Figure 5c**). This is  
367 similar to the behavior of *TREM2*, another well-validated AD susceptibility gene (**Figure 5c**); however,  
368 its relation to amyloid pathology in ROSMAP data was previously reported as being modest<sup>27</sup>. MD-AD  
369 was able to uncover its more prominent role in transcriptional data, which is obscured by its sex-  
370 dependent nature. Likewise, women reported to have higher expression of a signature of aged microglia  
371 in these data<sup>26</sup>, and two modules of co-expressed cortical genes enriched for microglial genes and  
372 associated with amyloid (module m114) or tau (module m5) pathology are also influenced by sex<sup>37</sup>.  
373 However, the role of neither group of genes is explained by sex; this indicates that the role of sex in the  
374 impact of the immune system in AD is complex. MD-AD was able to uncover this complexity more

375 effectively, as is illustrated in **Figure 5c** where some genes have greater effects in men and other in  
376 women. Thus, it is not the case that role of the immune system is polarized in one of the two sexes; rather,  
377 some pathways and perhaps certain cell subsets may have a larger role in women while others are  
378 dysfunctional in men. This could explain why the role of immune genes is more prominent in our  
379 analyses: reports from simpler linear models often included immune pathways<sup>6</sup> but other pathways  
380 usually figured more prominently in these earlier RNA-based network models. A meta-analysis of RNA  
381 studies (which include the ROSMAP data) highlighted the larger number of sex-influenced genes among  
382 the AD-associated gene modules and noted that microglial cells appear to be enriched for both male and  
383 female-specific expression effects. With our list of results and our careful evaluation of sex effects we  
384 now have an important new road map with which to guide our exploration of the role of microglia in AD  
385 in a sex-informed manner. This perspective will be critical not only for mechanistic studies whose results  
386 could be obscured by sex effects but also, more importantly, by guiding the study design of clinical trials  
387 as highly targeted therapeutic agents emerge to modulate the immune system in AD.

388 This is but one of the narratives that has emerged from our initial deployment of the MD-AD approach in  
389 the aging brain. As new cohorts are characterized, sample sizes expand and new data such as single  
390 nucleus RNA sequencing profiles emerge, our approach will help to facilitate data integration and to  
391 uncover insights that would not otherwise emerge. Beyond enabling good predictions, our report may  
392 actually highlight a more important contribution of MD-AD in resolving key elements of the data  
393 structure in the nodes that we defined: these are more than simple aggregates of factors with predictive  
394 power. They are beginning to uncover complex interactions, such as the impact of sex which is involved  
395 in both men and women, but in different ways, making it difficult to appreciate the role of certain immune  
396 pathways in simpler statistical models.

397

398

## 399 FIGURE LEGENDS

400 **Figure 1.** Overview of the MD-AD method and analyses. **(a)** Overview of the MD-AD framework: MD-  
401 AD is trained to predict six neuropathology phenotypes simultaneously from brain gene expression  
402 samples. During model training, samples do not need to have all available phenotypes; they influence  
403 only the layers for which they have labels (including shared layers). **(b)** Illustrates out-of-sample datasets  
404 we used to validate MD-AD's predictions **(c)** Illustrates analyses used to validate the last shared layer of  
405 MD-AD. **(d)** By using model interpretability methods, we highlight genes relevant to MD-AD's  
406 predictions. Further analyses reveal non-linear effects among genes and their relationship with AD  
407 severity prediction.

408 **Figure 2.** MD-AD prediction performance for within-sample and out-of-sample data. **(a)** Average test set  
409 mean squared error (MSE) for phenotype predictions across 5 test splits. MLP: Multiple Layer  
410 Perceptron. Linear: linear model using L2 regularization. **(b)** Average MSE for ROSMAP test set samples  
411 when training on subsets of the available data sets in the training set. **(c)** For samples from three external  
412 validation data sets, we obtain neuropathology scores for each sample by averaging the percentiles of  
413 predictions across all six neuropathology variables. *Left:* t-test statistics measuring the difference between  
414 each model's predicted neuropathology scores for AD-diagnosed vs. control individuals. All tests results  
415 were statistically significant ( $p < .001$ ). *Right:* Box plots displaying the distribution of MD-AD's predicted  
416 neuropathology scores split by age group and diagnosis (see **Supplementary Figure 3b** for sample sizes  
417 and significance of pair-wise differences). **(d)** *Left:* t-test statistics measuring the difference between each  
418 model's predicted neuropathology score for heterozygous TASTPM vs. wild type mice. *Middle:* t-test  
419 statistics measuring the difference between each model's predicted neuropathology score for homozygous  
420 TASTPM vs. wild type mice (\*:  $p < .05$ , \*\*:  $p < .01$ , \*\*\*:  $p < .001$ ). *Right:* Box plots displaying the  
421 distribution of MD-AD's predicted neuropathology scores for mice split by age and strain (See  
422 **Supplementary Figure 3c** for sample sizes and significance of pair-wise differences).

423 **Figure 3.** Comparing MD-AD's supervised embedding to other embedding methods. **(a)** For each colored  
424 box, *Left:* 2-dimensional t-SNE embedding of MD-AD's last shared layer colored by neuropathological  
425 phenotype indicated in the title of the box, *Right:*  $-\log_{10}(p\text{-value})$  of correlations between "best" node  
426 from each embedding method and the neuropathological phenotype across 5 test folds. The "best" node  
427 was identified as the most significantly correlated in the training set, but the figure reports correlation -  
428  $\log_{10}(p\text{-value})$ 's in their corresponding test sets. Bar graph columns (left to right): two unsupervised  
429 embeddings (green; K-Means and PCA), three module-based embeddings (orange; Modules #1<sup>7</sup> and  
430 Modules #2<sup>6</sup>, and Modules #3<sup>9</sup>), six singly-trained MLPs (blue), and MD-AD (red). **(b)** Highest  
431 correlation  $-\log_{10}(p\text{-values})$  (averaged across 5 training folds) found between each embedding method and  
432 high-level AD phenotypes: dementia (diagnosis prior to death), dementia duration (approximate time  
433 between dementia diagnosis and death; available for ACT and ROSMAP), and last available cognition  
434 score (controlling for age, sex and education; available for ROSMAP only). All  $p$ -values listed are shown  
435 after FDR correction over the nodes within each method. **(c)** 2-dimensional t-SNE embedding of  
436 alternative embedding methods (described in **a**). **(d)** 2-dimensional t-SNE embeddings of MD-AD  
437 embeddings for training and external data sets. Each point represents a sample colored by dataset (Left),  
438 AD status for external samples (Middle) and MD-AD's predicted neuropathology score (Right). **(e)** 2-  
439 dimensional t-SNE embeddings of MD-AD embeddings for external human and mouse samples.

440 **Figure 4.** Top predictive genes for the consensus MD-AD model. **(a)** Top 50 MD-AD genes and whether  
441 they are negatively (-) or positively (+) associated with high neuropathology. Colored squares indicate

442 that the gene belongs at least one pathway in the column-labeled REACTOME category. **(b)** Gene set  
443 enrichment  $-\log_{10}(p\text{-value})$  across the final MD-AD gene ranking for REACTOME pathways. Bars are  
444 colored by the pathway's REACTOME category. We show all pathways with significant enrichment  
445 ( $p < .01$ ). REACTOME pathways with long names are indicated by their REACTOME stable IDs. **(c)**  
446 Comparison of top genes from MD-AD vs a linear correlation-based approach. For each ranking method,  
447 we identify the top 1% of all genes and check their membership in REACTOME categories. For each  
448 REACTOME category with at least 15 genes in the top 1% of MD-AD and/or correlation rankings, we  
449 generate the following plot: each line represents a gene, with left endpoint at the percentile rank for MD-  
450 AD and right endpoint at percentile rank for correlations. For clarity, we color the line purple if the gene  
451 falls in the top 1% of both MD-AD and correlations, red if it is only in the top 1% of MD-AD, and blue if  
452 it is only in the top 1% of correlations. Finally, the title indicates the ratio of MD-AD to correlation-based  
453 top genes for the given REACTOME category.

454 **Figure 5.** MD-AD's top genes and their interactions with sex. **(a)** For the top 100 MD-AD genes, we  
455 compute the significance of the interaction between expression and sex for its MD-AD score. The bars  
456 indicate the gene's  $-\log_{10}(p\text{-value})$  of the interaction term with sex (after FDR correction), and pathway  
457 categories each gene belongs to are indicated below. A filled square indicates that the gene significantly  
458 interacts with sex ( $p < .05$  after FDR correction), and an "x" marker indicates that it does not. **(b)** For  
459 genes with significant sex interactions, we compute the significance of the overlap between REACTOME  
460 category genes and sex-differential genes among: Left: all genes, and Right: the top 100 MD-AD genes  
461 only. **(c)** For the top 100 MD-AD genes, we identify the genes with the most significant sex interaction  
462 for MD-AD scores. We show the significance of the interaction (Top) and the interaction coefficients  
463 (Bottom) for the top 6 most sex-differential genes. Each gene's MD-AD rank is indicated in their x-axis  
464 labels **(d)** For the top 6 most-sex differential top 100 MD-AD genes, we display scatter plots of  
465 expression by MD-AD score, coloring each sample by sex of the donor.

466 **Figure 6.** MD-AD's reliance on microglial cluster genes and gene set signatures. **(a)** Bars indicate the  
467 gene's  $-\log_{10}(p\text{-value})$  of the interaction term with sex (after FDR correction), and gene membership in  
468 microglial cluster gene sets from Olah et al.<sup>30</sup> is indicated below. A filled square indicates that the gene  
469 significantly interacts with sex ( $p < .05$  after FDR correction), and an "x" marker indicates that it does not.  
470 **(b)** For genes with significant sex interactions, we compute the significance of the overlap between  
471 microglial cluster genes and sex-differential genes among: Left: all genes, and Right: the top 100 MD-  
472 AD genes only. **(c)** Gene set enrichment  $-\log_{10}(p\text{-value})$  across the final MD-AD gene ranking for cell  
473 type signatures.<sup>8</sup>

474 **Figure 7.** MD-AD's transfer performance for blood gene expression data sets. **(a)** Shows t-test statistics  
475 comparing average predicted neuropathology between individuals with mild cognitive impairment (MCI;  
476 Left) and Alzheimer's dementia (AD; Right) vs. cognitively normal (CTL) individuals. **(b)** Box plots  
477 show the differences in predicted neuropathology for blood samples from individuals stratified by age  
478 group and cognitive status. Significant differences are shown in **Supplementary Figure 10b**. **(c)** t-SNE  
479 embedding of last shared layer from MD-AD models trained for Blood1 and Blood2 datasets. Samples are  
480 colored by their dataset (Left), cognitive status (while brain samples are shown in grey; Middle), and  
481 predicted neuropathology score (Right).

482

## 483 SUPPLEMENTARY METHODS

### 484 1. DATA PROCESSING

485 For developing the MD-AD model, we used data from the following RNA-Seq and neuropathology  
486 datasets available through the AMP-AD Knowledge Portal: (1) Adult Changes in Thought (ACT)<sup>15</sup>,  
487 (2) Mount Sinai Brain Bank (MSBB)<sup>16</sup>, and (3) Religious Orders Study/Memory and Aging Project  
488 (ROSMAP)<sup>6,13,14</sup>. Details of sample collection and sequencing methods are described in previously  
489 published work<sup>6,13-16</sup>. We pooled together brain gene expression data from the temporal cortex, parietal  
490 cortex, hippocampus, and forebrain white matter from ACT, Brodmann areas 10, 22, 36, and 40 from  
491 MSBB, and the dorsolateral prefrontal cortex from ROSMAP. To avoid confounding conditions, we  
492 excluded samples from individuals who had neuropathological diagnoses other than AD. Taken together,  
493 the studies provide 1,758 gene expression samples.

494 In order to compile gene expression samples across the three cohorts, we retain expression levels for  
495 genes which are present in all datasets. Within each dataset, we exclude genes with null values for over  
496 two-thirds of samples. Before combining datasets, we log-transformed the expression values and then  
497 normalized them for each gene to vary between 0 and 1. We then combined the gene expression datasets  
498 and performed batch effect correction with ComBat<sup>17</sup> to reduce systematic differences across studies  
499 (**Supplementary Figure 1b-c**)<sup>17</sup>. The resulting dataset contains 1,758 gene expression samples, each with  
500 14,591 genes measured.

501 Next, for each gene expression sample, we incorporated the available corresponding neuropathology  
502 labels: (1) **A $\beta$  IHC**: amyloid- $\beta$  protein density via immunohistochemistry, (2) **plaques**: neuritic amyloid  
503 plaque counts from stained slides, and (3) **CERAD score**: a semi-quantitative measure of neuritic plaque  
504 severity<sup>38</sup>, (4)  **$\tau$  IHC**: abnormally phosphorylated  $\tau$  protein density via immunohistochemistry, (5)  
505 **tangles**: neurofibrillary tangle counts from silver stained slides, and (6) **Braak stage**: a semi-quantitative  
506 measure of neurofibrillary tangle pathology<sup>19</sup>. Detailed descriptions for each phenotype within each  
507 dataset are provided in **Supplementary Table 1**. Because Braak stage and CERAD score are global  
508 measurements of neuropathological damage, if an individual had multiple available gene expression  
509 measurements from different regions, they each sample was labeled with the same Braak and CERAD  
510 values. However, A $\beta$ -IHC and  $\tau$ -IHC were provided for several brain regions for both ROSMAP and  
511 ACT studies. Therefore, each expression sample was labeled with the A $\beta$ -IHC and  $\tau$ -IHC measurements  
512 for the same or nearest region. Because the available plaques label provided by MSBB was averaged over  
513 several brain regions, we similarly used ROSMAP's average plaques and tangles labels (aggregated from  
514 several regions) for consistency with MSBB's metrics (see **Supplementary Table 1**). Finally, for  
515 consistency across datasets, we first normalized all neuropathological variables to vary between 0 and 1  
516 before combining datasets.

517

### 518 2. COMPUTATIONAL METHODS

#### 519 A. Review of previous approaches

520 Post-mortem transcriptomic studies have investigated molecular phenotypic and neuropathological  
521 outcomes in AD. Early work in this domain examined simple correlations among gene expression and  
522 AD symptoms<sup>10</sup> or compared gene expression levels across AD-patients versus controls<sup>11</sup>. More recently,  
523 more systematic network-based analyses have contributed to the understanding of AD biology. In

524 particular, Zhang et al.<sup>7</sup> constructed molecular networks based on bulk gene expression data separately  
525 for individuals with and without AD, and identified modules with remodeling effects in the AD network.  
526 More recently, Mostafavi et al.<sup>6</sup> used co-expressed genes in the aging human frontal cortex to build a  
527 single molecular network and identified modules related to AD neuropathological and cognitive  
528 endophenotypes. Using single-cell RNA sequencing data, Mathys et al.<sup>8</sup> clustered cells within brain cell-  
529 types to identify and characterize AD-related cellular sub-populations. Each of these approaches have  
530 been applied to single cohorts. Until recently, a unified and robust modeling of AD neuropathology based  
531 on brain gene expression has been hindered by relative scarcity and regional heterogeneity of brain gene  
532 expression datasets. One possible solution is to combine multiple data sets to gain statistical power. The  
533 collection of postmortem brain RNA-sequencing datasets, assembled by the AMP-AD (**A**ccelerating  
534 **M**edicines **P**artnership **A**lzheimer's **D**isease) consortium, provides new opportunities to combine multiple  
535 data sets. However, such heterogeneous datasets pose challenges to many methods, which must account  
536 for inter-study differences. In a recent attempt, Logsdon et al.<sup>9</sup> used a meta-analysis approach to identify  
537 co-expressed modules separately for 7 brain regions across 3 datasets, then subsequently applied  
538 consensus methods to identify modules that were conserved across multiple regions and studies. As of  
539 now, we're not aware of any methods that directly model all data in a unified way.

## 540 **B. The MD-AD Model**

541 MD-AD (**M**ulti-task **D**eep learning for **A**lzheimer's **D**isease neuropathology), is a *unified framework for*  
542 *analyzing heterogeneous AD datasets* to improve our understanding of expression basis for AD  
543 neuropathology (**Figure 1**). Unlike previous approaches, MD-AD learns a single neural network by  
544 jointly modeling multiple neuropathological measures of AD severity phenotypes, and hence can  
545 incorporate data collected from multiple datasets. This *unified* framework has key advantages over  
546 separately trained models. First, MD-AD allows sparsely labeled data, which is a natural characteristic of  
547 datasets aggregated through consortium efforts (**Figure 1e**). Even if different phenotypes only partially  
548 overlap in the measured samples, each sample contributes to the training of both phenotype-specific and  
549 shared layers. Predicting multiple phenotypes at once biases shared network layers to capture relevant  
550 features of these AD phenotypes at the same time. This is of critical importance: each phenotype  
551 represents a *different type* of noisy measurement of the same underlying true biological process, and as  
552 we demonstrate by joint training MD-AD is able to average out the noise to extract the true hidden signal.  
553 Additionally, the increased sample size enables MD-AD to capture complex non-linear interactions  
554 between genes and phenotypes. In contrast, Multi-layer perceptrons (MLPs) offer another powerful  
555 approach for directly capturing complex relations between gene expression and a phenotype. However,  
556 training separate MLPs for each phenotype (**Supplementary Figure 1a**) has limited scope: it can utilize  
557 only the samples measured for a specific phenotype, and it cannot share information across related  
558 phenotypes. We demonstrate that these advantages improve MD-AD prediction accuracy, enabling it  
559 predictions to generalize across species and tissue types (**Figure 1b**). As illustrated in **Figure 1a**, the MD-  
560 AD network jointly predicts six neuropathological phenotypes from gene expression input data via shared  
561 hidden layers followed by task-specific hidden layers.

562

## 563 **3. TRAINING & EVALUATING MD-AD**

564 As described above, we build the MD-AD model in Python using the TensorFlow and Keras packages. In  
565 order to have efficient and robust training and to reduce overfitting, we apply a principal component

566 analysis (PCA) transformation to the data and use resulting top 500 principal components – a 500-  
567 dimensional representation of our 14,591 gene expression values – as the input to the MD-AD and all  
568 baseline models. For comparison to MD-AD, we generate six analogous MLP networks with un-shared  
569 representations, and six linear models containing no hidden layers, to serve as baseline models (see  
570 **Supplementary Figure 1a**).

571 In order to robustly evaluate the performance of the models, we segment the dataset into five parts, and  
572 each part is treated as a test set once. Within each of the five training and test split splits, each model  
573 architecture was trained and hyperparameter-tuned using five-fold cross validation within the training set.  
574 We then train each model with the best hyperparameters found by cross validation using the full training  
575 set before performance was evaluated on the corresponding test set (see **Supplementary Figure 1d**).  
576 Thus, prediction performance reported in the results section are the average of these five test performance  
577 values. For training the models, we use a mean squared error (MSE) loss function applied to each  
578 phenotype prediction. For the MLP and linear baselines, parameters of the networks are updated via back-  
579 propagation for 200 epochs from the mean-squared error (MSE) of the network's prediction on the given  
580 variable's label among training batches. Similarly, MD-AD's parameters are also updated via back-  
581 propagation, with the loss function calculated as the sum over MSEs across all six prediction tasks  
582 (masking losses for missing phenotypes). For MD-AD, we explored several different options for  
583 architectures with different amounts of shared and task-specific layers (**Supplementary Figure 2b-c**).  
584 We selected the final architecture (shown in **Figure 1a**) because we wanted to have multiple hidden  
585 layers in both the shared portion and task-specific portion of the network to allow for non-linear  
586 interactions to be learned in both the shared representation and in the task-specific branches, and  
587 **Supplementary Figure 2b-c** shows that alternatives to this approach tended to perform similarly or  
588 worse.

#### 589 **A. Internal test-set validation**

590 As described above, for each training and test split, we use five-fold cross-validation to make modeling  
591 choices for the MD-AD model and baselines before training each model with the full training set and  
592 reporting and reporting test MSEs (averaged over all five test splits). We evaluate model performance in  
593 two ways: (1) standard train and test sets, and (2) ROSMAP test performance for different subsets of the  
594 available datasets.

595 First, separately for each of our five cross validation training sets, we calculate the final test MSE on the  
596 corresponding hold-out set. To test whether these effects are significant, for each baseline method, we  
597 performed one-sided paired t-tests to determine whether there is a significant difference between the  
598 baseline method's error and MD-AD's across the five test folds (**Figure 2a**). Next, in order to evaluate  
599 the contributions of each dataset to prediction performance, we performed the above procedure with  
600 different subsets of available datasets. Because ROSMAP is the only dataset with all available  
601 phenotypes, we evaluate performance specifically on ROSMAP. In **Figure 2b**, we show ROSMAP test  
602 samples' MSE performance when trained on all subsets of ACT, MSBB, and ROSMAP training samples  
603 (following the same cross-validation procedure described above).

#### 604 **B. External dataset validation (Human)**

605 In order to evaluate MD-AD's ability to generalize to out of sample data, we assessed performance on  
606 three datasets: Mount Sinai Brain Bank Microarray (MSBB-M; N=1,053), Harvard Brain Tissue

607 Resource Center (HBTRC; N=460), and Mayo Clinic Brain Bank (N=323). These datasets were collected  
608 from AMP-AD, but were left out of the original MD-AD training because they were microarray samples  
609 or lacked many neuropathology labels.

610 After normalizing gene expression samples from external data sets in the same way as described for the  
611 ACT, MSBB RNA Seq, and ROSMAP datasets, we then adjust the expression values to have similar  
612 distributions to our batch corrected training data sets. We evaluated the MD-AD model on our new  
613 processed data to obtain predictions for all six phenotypes. Because these three external datasets provide a  
614 sparse set of neuropathological labels, we do not have access to labels for many of the six MD-AD labels.  
615 Instead, we evaluated whether MD-AD's predictions were consistent with the (binary) neuropathological  
616 diagnosis of AD, by aggregating MD-AD's various neuropathology predictions into one "neuropathology  
617 score". The "neuropathology score" was produced by first calculating percentiles across samples (within  
618 each dataset) for each neuropathological phenotype, then averaging over the six phenotypes.

619 **Figure 2c** shows that MD-AD provides the largest differences in neuropathology scores between  
620 individuals with and without neuropathological diagnoses of AD. We further compared neuropathology  
621 scores between AD and non-AD individuals split by age group (significance between groups shown in  
622 **Supplementary Figure 3b**)

### 623 C. Cross-species validation (Mouse)

624 To evaluate how well expression patterns predictive of neuropathology learned by MD-AD recapitulates  
625 neuropathology in mouse models. To that end, we obtained gene expression data from Matarin et al.<sup>20</sup>  
626 for 30 TASTPM mice which harbor double transgenic mutation in APP and PSEN1, as well as 76 wild  
627 type mice. Data were quantile-normalized and log transformed. For this experiment, we mapped mouse to  
628 human genes (via gene symbols) for a total of 7,057 intersecting genes between our training dataset and  
629 the mouse expression data, which were again normalized to follow the same distributions as our MD-AD  
630 training data. We retrained our MD-AD model on only these 7057 genes for all MD-AD samples and then  
631 generated "neuropathology scores" for the mouse samples exactly as described in the previous section. As  
632 with out-of-sample experiments described above, we compare MD-AD to MLPs and linear models in  
633 separating neuropathology scores between TASTPM and wild type mice (Figure 2E). We also show  
634 differences in neuropathology scores between different age groups (**Figure 2d, Supplementary Figure**  
635 **3c**).

### 636 D. Supervised embedding validation

637 The output of an intermediate layer of a neural network can be viewed as lower dimensional embedding  
638 of the input features. In this paper, we focus on the last shared layer of the MD-AD network because it is  
639 a supervised embedding of gene expression data which is influenced by all six training phenotypes. We  
640 evaluate the embedding compared with those generated by both singly-trained MLPs as well as  
641 unsupervised methods (i.e., K-Means and principal components analysis (PCA)) in two ways: (1) high  
642 level visualization with t-SNE, and (2) evaluating the correspondence between individual nodes and AD-  
643 related features.

644 **Visualizations with t-SNE:** For each of the MD-AD, MLP, and unsupervised models, we train the models  
645 on the full combined dataset. For the deep learning models, we then generate "supervised" embeddings by  
646 obtaining the output of the last shared layer (or analogous layer of the MLP model). For the unsupervised



647 methods, K-Means and PCA, we generate an embedding of 100 dimensions to be consistent with the MD-  
648 AD and MLP models. After generating these embeddings for all samples, we then compress them to 2  
649 dimensions via the t-SNE algorithm<sup>21</sup>. T-SNE Visualizations of MD-AD's supervised embedding are  
650 shown in **Figure 3a** (left side for each phenotype), and the figure is replicated with six times, with each  
651 plot showing samples colored by neuropathological phenotype severity for each of the six phenotypes.  
652 For comparison, t-SNE visualizations for the singly-trained MLPs and unsupervised methods are shown  
653 in **Figure 3c** (colored by CERAD Score only) and colored by other phenotypes and covariates of interest  
654 in **Supplementary Figure 5**.

655 **Node-phenotype correlations:** To test whether MD-AD's embedding generalizes more to AD phenotypes  
656 than the alternative methods, we compare the nodes that best capture each phenotype among MD-AD,  
657 MLPs, and unsupervised methods. We perform the following analysis with the same five training and test  
658 splits described earlier: for each of the six phenotypes used in MD-AD's training, we identify the node in  
659 MD-AD's last shared layer whose output is most significantly correlated with that phenotype in the  
660 training set. We then report the  $-\log_{10}(p\text{-value})$  (after FDR correction over nodes) for the correlation  
661 between that node's output and the training phenotype in the test set, averaged across the train/test splits.  
662 (**Figure 3a**, right side for each phenotype).

663 We also perform a similar analysis with higher-level AD phenotypes not used during model training:  
664 dementia diagnosis (binary variable available in all datasets), last available cognition score (controlling  
665 for age, sex, and education; only available for the ROSMAP dataset), and AD duration (i.e., time between  
666 dementia diagnosis and death; available for the ACT and ROSMAP datasets). For this analysis, we report  
667 the highest  $-\log_{10}(p\text{-value})$  after FDR correction between nodes and the high-level phenotypes, average  
668 over the five test sets (**Figure 3b**).

669

## 670 4. MODEL INTERPRETATION

### 671 A. Constructing and annotating MD-AD consensus nodes (**Figure S7**)

672 Because deep neural networks have non-convex loss functions, randomness in our training procedure  
673 produces networks with different weights from run to run. In order to capture robust nodes and highly  
674 relevant genes, we repeat our training procedure 100 times, in order to simulate a "consensus network".  
675 As shown in **Supplementary Figure 6a**, we construct "MD-AD consensus nodes" by clustering nodes  
676 from many runs: (1) we train 100 MD-AD networks, (2) we obtain last shared layer node outputs for all  
677 samples and normalize them (0-mean, unit variance), (3) we combine all nodes across all runs and then  
678 cluster them using k-means (where the dimensions used to calculate similarity are samples) with  $k=50$ ,  
679 (4) we summarize each cluster of nodes by their medoid. Thus, for each sample, the MD-AD consensus  
680 embedding is made up of 50 nodes which are medoids of clusters generated from 100 re-trainings.

681 In **Supplementary Figure 4b**, we provide a visual overview of the MD-AD consensus embedding  
682 generated as described above. To provide a simple view of clusters, we select a subset of samples for  
683 which we have clear high or low pathology, excluding ambiguous cases. We include (1) individuals with  
684 Braak stage of at least 5 and CERAD scores at least 3 (i.e., "moderate"), or (2) individuals with Braak  
685 stage of 3 or lower and a CERAD score of 1 (i.e., "absent") who are at least 85 years old and have no  
686 dementia. Case 1 captures all individuals with pathologic AD diagnoses (with and without dementia),  
687 whereas case 2 captures all individuals considered "resistant" to AD due to their old age but lack of

688 cognitive or neurological decline (consistent with previous literature, e.g. Latimer et al. (2019)). To  
689 annotate each node in the consensus embedding, we display their correlations with various phenotypes  
690 and covariates, as well as their enrichment for REACTOME pathways.

691 **Correlations:** For each variable (neuropathological phenotypes, high-level AD phenotypes, and  
692 covariates), we compute the correlation  $-\log_{10}(\text{p-value})$  between the variable and each consensus node  
693 output. In **Supplementary Figure 4c**, a high  $-\log_{10}(\text{p-value})$  indicates that a node captures (or is highly  
694 linearly related to) a variable.

695 **Pathway enrichment:** Beyond relationships between nodes and phenotypes, we annotated nodes with  
696 which gene sets are relevant to their outputs. For each of the fully trained MD-AD model, we use  
697 integrated gradients (IG)<sup>12</sup> to obtain sample-level gene importances for each consensus node. Note that  
698 each consensus node (as medoid within a cluster) is some node in one of the 100 re-training runs of MD-  
699 AD, thus we perform integrated gradients for the specific node in that network. By generating sample-  
700 level gene attributions for each sample, we are able to aggregate the absolute IG values across samples to  
701 obtain average gene attributions for each gene on each node. For each MD-AD consensus node, this  
702 method therefore provides us with a ranking over all genes by their importance. We then test for  
703 enrichment of REACTOME pathways<sup>40</sup> in these gene rankings via gene set enrichment analysis (GSEA)  
704<sup>22,23</sup> to identify whether certain pathways seem to be involved in the activation these nodes. Enriched  
705 pathways for the MD-AD consensus nodes are shown in **Supplementary Figure 4d**. **Supplementary**  
706 **Table 2** provides detailed annotations for each node.

## 707 B. Identifying MD-AD's top genes

708 In order to identify genes that drive MD-AD predictions, we used integrated gradients (IG)<sup>12</sup> to provide  
709 importance estimates of each gene on the predicted outcomes. Again, in order to improve model stability,  
710 we calculate gene rankings based on 100 re-trainings. After each run of training, we take our trained  
711 model and apply IG for each sample to get the importance of each gene on each phenotype prediction. We  
712 then calculate a weighted average by sample (weighted by relative pathology) to compute a global  
713 importance value for each gene on each phenotype, where positive values indicate that high expression of  
714 the gene relates to more severe AD phenotypes. Finally, by averaging over all phenotypes, we obtain our  
715 final "IG score" the given round of MD-AD training. By averaging these score across 100 re-trainings, we  
716 arrive at our "consensus IG score" for MD-AD. Negative scores imply that higher expression is  
717 associated with less pathology, while positive scores imply that higher expression is associated with more  
718 pathology, according to MD-AD. We note that 100 re-trainings are more than enough to converge to a  
719 stable gene ranking (**Supplementary Figure 6c**). The top genes for MD-AD are shown in **Figure 4a**, and  
720 enriched REACTOME pathways in the top ranked MD-AD genes (via GSEA) are shown in **Figure 4b**.  
721 The full gene ranking, generated separately for each phenotype, is provided in **Supplementary Table 4**.

722 For comparison with a linear gene ranking method, we also calculate the correlations between each gene  
723 with each neuropathological phenotype (across all samples in our dataset), and then rank the genes by  
724 their average correlation coefficients across all six phenotypes. Comparisons between REACTOME  
725 categories represented in the top MD-AD vs correlation-based rankings are shown in **Figure 4c**.

## 726 C. Calculating nonlinear effects for MD-AD genes

727 As a deep learning method MD-AD has the capacity to identify non-linear relationships among genes'  
728 expression levels and neuropathological phenotypes. These non-linear relationships may reveal an  
729 implicit capture of interaction effects with other covariates observable from expression data. Thus, we  
730 sought to investigate the presence of interactions between sample-level covariates and specific genes in  
731 their contributions to the MD-AD predictions. To monitor the presence of these interaction effects, we  
732 modeled the consensus IG scores as a linear combination of a gene's expression level, a covariate of  
733 interest, and the interaction of the two. Specifically,  $score_{g,i} = \mathbf{a} \text{expr}_{g,i} + \mathbf{b} \text{feat}_i + \mathbf{c} \text{expr}_{g,i} \text{feat}_i +$   
734  $\mathbf{d}$ , where  $score_{g,i}$  is the consensus IG value for gene  $g$  and sample  $i$ ,  $\text{expr}_{g,i}$  is the sample  $i$ 's expression  
735 level for gene  $g$ , and  $\text{feat}_i$  is sample  $i$ 's value for the covariate. Based on this representation, we consider  
736 there to be an interaction effect between a gene and feature on its importance in the MD-AD model if the  
737 learned  $\mathbf{c}$  coefficient is statistically significant ( $p < .05$ , after FDR correction over all genes). We primarily  
738 focus on identifying an interaction effects with sex ( $\text{feat}_i = 1$  if sample  $i$  comes from a male), and rank  
739 interactions between genes and sex for MD-AD based on the  $-\log_{10}(\text{p-value})$  of the interaction term.

740 **Gene set enrichment:** We evaluated whether sex-differential genes were enriched for the following gene  
741 sets: (1) REACTOME pathways<sup>40</sup> and (2) microglial cluster gene signatures from a recent single cell  
742 RNA Seq analysis of microglial cells from autopsied aging brains<sup>30</sup>. To evaluate whether the list of sex-  
743 differential MD-AD genes are enriched for gene sets of interest, we use Fisher's exact tests to evaluate the  
744 significance of overlap between all sex-differential genes and members of each gene set. Next, to evaluate  
745 whether the top MD-AD sex-differential genes are enriched for the same gene sets, we perform Fisher's  
746 exact tests again, but this time only consider the top 100 MD-AD genes in the calculations.

## 747 5. BLOOD GENE EXPRESSION VALIDATION

748 To evaluate the ability of MD-AD to transfer to blood gene expression data, we downloaded publically  
749 available AddNeuroMed cohort data from GEO (GSE63060 and GSE63061, which we refer to as Blood1  
750 and Blood2, respectively). Details about the AddNeuroMed samples are provided in **Supplementary**  
751 **Table 3**. As with the other validation datasets, each blood dataset was normalized such that each gene's  
752 expression values have the same mean and variance as the processed MD-AD expression data. Because  
753 each blood dataset had a different set of available genes, for each dataset, we re-trained MD-AD  
754 consensus models for brain samples with only the genes available between them and blood samples  
755 (12,104 and 11,392 genes for Blood1 and Blood2 respectively). Because these blood samples came from  
756 living participants, we do not have access to the many neuropathology variables available across the brain  
757 samples. Instead, we assess whether MD-AD's predictions align with individuals' cognitive diagnosis of  
758 cognitively normal (CTL), mild cognitive impairment (MCI), or dementia.

759 We evaluate the effectiveness of the MD-AD model by comparing predicted MD-AD pathology scores  
760 between CTL and MCI individuals, and between CTL individuals and individuals with dementia via two-  
761 sided t-tests (together, and split by age). To evaluate the MD-AD embedding for blood samples,  
762 separately for each blood dataset, we obtain the last shared layer embeddings of both the MD-AD brain  
763 expression samples and blood samples from the first round of training.

764

765 **REFERENCES**

- 766 1. De Jager, P. L., Yang, H. S. & Bennett, D. A. Deconstructing and targeting the genomic  
767 architecture of human neurodegeneration. *Nat. Neurosci.* **21**, 1310–1317 (2018).
- 768 2. Gaiteri, C., Mostafavi, S., Honey, C. J., De Jager, P. L. & Bennett, D. A. Genetic variants  
769 in Alzheimer disease-molecular and brain network approaches. *Nat. Rev. Neurol.* **12**, 413–  
770 427 (2016).
- 771 3. Marioni, R. E. *et al.* GWAS on family history of Alzheimer’s disease. *Transl. Psychiatry*  
772 **8**, 0–6 (2018).
- 773 4. Jansen, I. E. *et al.* Genome-wide meta-analysis identifies new loci and functional  
774 pathways influencing Alzheimer’s disease risk. *Nat. Genet.* **51**, 404–413 (2019).
- 775 5. Kunkle, B. W. *et al.* Genetic meta-analysis of diagnosed Alzheimer’s disease identifies  
776 new risk loci and implicates A $\beta$ , tau, immunity and lipid processing. *Nat. Genet.* **51**, 414–  
777 430 (2019).
- 778 6. Mostafavi, S. *et al.* A molecular network of the aging human brain provides insights into  
779 the pathology and cognitive decline of Alzheimer’s disease. *Nat. Neurosci.* **21**, 811–819  
780 (2018).
- 781 7. Zhang, B. *et al.* Integrated systems approach identifies genetic nodes and networks in late-  
782 onset Alzheimer’s disease. *Cell* **153**, 707–720 (2013).
- 783 8. Mathys, H. *et al.* Single-cell transcriptomic analysis of Alzheimer’s disease. *Nature* **570**,  
784 332–337 (2019).
- 785 9. Logsdon, B. A. *et al.* Meta-analysis of the human brain transcriptome identifies  
786 heterogeneity across human AD coexpression modules robust to sample collection and  
787 methodological approach. (2019). doi:10.7303/syn17114455
- 788 10. Blalock, E. M. *et al.* Incipient Alzheimer’s disease: Microarray correlation analyses reveal  
789 major transcriptional and tumor suppressor responses. *Proc. Natl. Acad. Sci. U. S. A.* **101**,  
790 2173–2178 (2004).
- 791 11. Katsel, P., Li, C. & Haroutunian, V. Gene expression alterations in the sphingolipid  
792 metabolism pathways during progression of dementia and Alzheimer’s disease: A shift  
793 toward ceramide accumulation at the earliest recognizable stages of Alzheimer’s disease?  
794 *Neurochem. Res.* **32**, 845–856 (2007).
- 795 12. Sundararajan, M., Taly, A. & Yan, Q. Axiomatic attribution for deep networks. *34th Int.*  
796 *Conf. Mach. Learn. ICML 2017* **7**, 5109–5118 (2017).
- 797 13. Bennett, D. A., Schneider, J. A., Arvanitakis, Z. & Wilson, R. S. Overview and findings  
798 from the religious orders study. *Curr. Alzheimer Res.* **9**, (2012).
- 799 14. Bennett, D. A. *et al.* Overview and Findings from the Rush Memory and Aging Project.  
800 *Curr. Alzheimer Res.* **9**, 646–663 (2012).
- 801 15. Miller, J. A. *et al.* Neuropathological and transcriptomic characteristics of the aged brain.  
802 *Elife* **6**, 1–26 (2017).
- 803 16. Wang, M. *et al.* The Mount Sinai cohort of large-scale genomic, transcriptomic and  
804 proteomic data in Alzheimer’s disease. *Sci. Data* **5**, 1–16 (2018).

- 805 17. Johnson, W. E., Li, C. & Rabinovic, A. Adjusting batch effects in microarray expression  
806 data using empirical Bayes methods. *Biostatistics* **8**, 118–127 (2007).
- 807 18. Mirra, S. S. *et al.* The consortium to establish a registry for Alzheimer’s disease  
808 (CERAD). Part II. Standardization of the neuropathologic assessment of Alzheimer’s  
809 disease. *Neurology* **41**, 479–486 (1991).
- 810 19. Braak, H. & Braak, E. Neuropathological staging of Alzheimer-related changes. *Acta*  
811 *Neuropathol.* **82**, 239–259 (1991).
- 812 20. Matarin, M. *et al.* A Genome-wide gene-expression analysis and database in transgenic  
813 mice during development of amyloid or tau pathology. *Cell Rep.* **10**, 633–644 (2015).
- 814 21. van der Maaten, L. & Hinton, G. Visualizing Data using t-SNE. *J. Mach. Learn. Res.* **9**,  
815 2579–2605 (2008).
- 816 22. Daly, M. J. *et al.* PGC-1 $\alpha$ -responsive genes involved in oxidative phosphorylation are  
817 coordinately downregulated in human diabetes. *Nat. Genet.* **34**, 267–273 (2003).
- 818 23. Subramanian, A. *et al.* Gene set enrichment analysis: A knowledge-based approach for  
819 interpreting genome-wide expression profiles. *Proc. Natl. Acad. Sci. U. S. A.* **102**, 15545–  
820 15550 (2005).
- 821 24. Qiu, Y.-Q. KEGG Pathway Database. in *Encyclopedia of Systems Biology* (eds. Dubitzky,  
822 W., Wolkenhauer, O., Cho, K.-H. & Yokota, H.) 1068–1069 (Springer New York, 2013).  
823 doi:10.1007/978-1-4419-9863-7\_472
- 824 25. Trabzuni, D. *et al.* Widespread sex differences in gene expression and splicing in the adult  
825 human brain. *Nat. Commun.* **4**, (2013).
- 826 26. Olah, M. *et al.* A transcriptomic atlas of aged human microglia. *Nat. Commun.* **9**, 1–8  
827 (2018).
- 828 27. Chan, G. *et al.* CD33 modulates TREM2: Convergence of Alzheimer loci. *Nat. Neurosci.*  
829 **18**, 1556–1558 (2015).
- 830 28. Wang, Y. *et al.* TREM2 lipid sensing sustains the microglial response in an Alzheimer’s  
831 disease model. *Cell* **160**, 1061–1071 (2015).
- 832 29. Mathys, H. *et al.* Temporal Tracking of Microglia Activation in Neurodegeneration at  
833 Single-Cell Resolution. *Cell Rep.* **21**, 366–380 (2017).
- 834 30. Olah, M. *et al.* Single cell RNA sequencing of human microglia uncovers a subset that is  
835 associated with Alzheimer’s disease. (2020).
- 836 31. Lovestone, S. *et al.* AddNeuroMed - The european collaboration for the discovery of  
837 novel biomarkers for alzheimer’s disease. *Ann. N. Y. Acad. Sci.* **1180**, 36–46 (2009).
- 838 32. Johnson, E. C. B. *et al.* Large-scale proteomic analysis of Alzheimer’s disease brain and  
839 cerebrospinal fluid reveals early changes in energy metabolism associated with microglia  
840 and astrocyte activation. *Nat. Med.* **26**, 769–780 (2020).
- 841 33. Lambert, J. C. *et al.* Genome-wide association study identifies variants at CLU and CR1  
842 associated with Alzheimer’s disease. *Nat. Genet.* **41**, 1094–1099 (2009).
- 843 34. Farfel, J. M. *et al.* Relation of genomic variants for Alzheimer disease dementia to  
844 common neuropathologies. *Neurology* **87**, 489–496 (2016).

- 845 35. Chibnik, L. B. *et al.* CR1 is associated with amyloid plaque burden and age-related  
846 cognitive decline. **69**, 560–569 (2011).
- 847 36. Thambisetty, M. *et al.* Effect of complement CR1 on brain amyloid burden during aging  
848 and its modification by APOE genotype. *Biol. Psychiatry* **73**, 422–428 (2013).
- 849 37. Patrick, E. *et al.* A cortical immune network map identifies distinct microglial  
850 transcriptional programs associated with beta-amyloid and Tau pathologies. *Press*
- 851 38. Mirra, S. S. *et al.* The Consortium to Establish a Registry for Alzheimer’s Disease  
852 (CERAD): Part II. Standardization of the neuropathologic assessment of Alzheimer’s  
853 disease. *Neurology* **41**, (1991).
- 854 39. Latimer, C. S. *et al.* Resistance and resilience to Alzheimer’s disease pathology are  
855 associated with reduced cortical pTau and absence of limbic-predominant age-related  
856 TDP-43 encephalopathy in a community-based cohort. *Acta Neuropathol. Commun.* **7**, 9  
857 (2019).
- 858 40. Jassal, B. *et al.* The reactome pathway knowledgebase. *Nucleic Acids Res.* **48**, D498–  
859 D503 (2020).
- 860

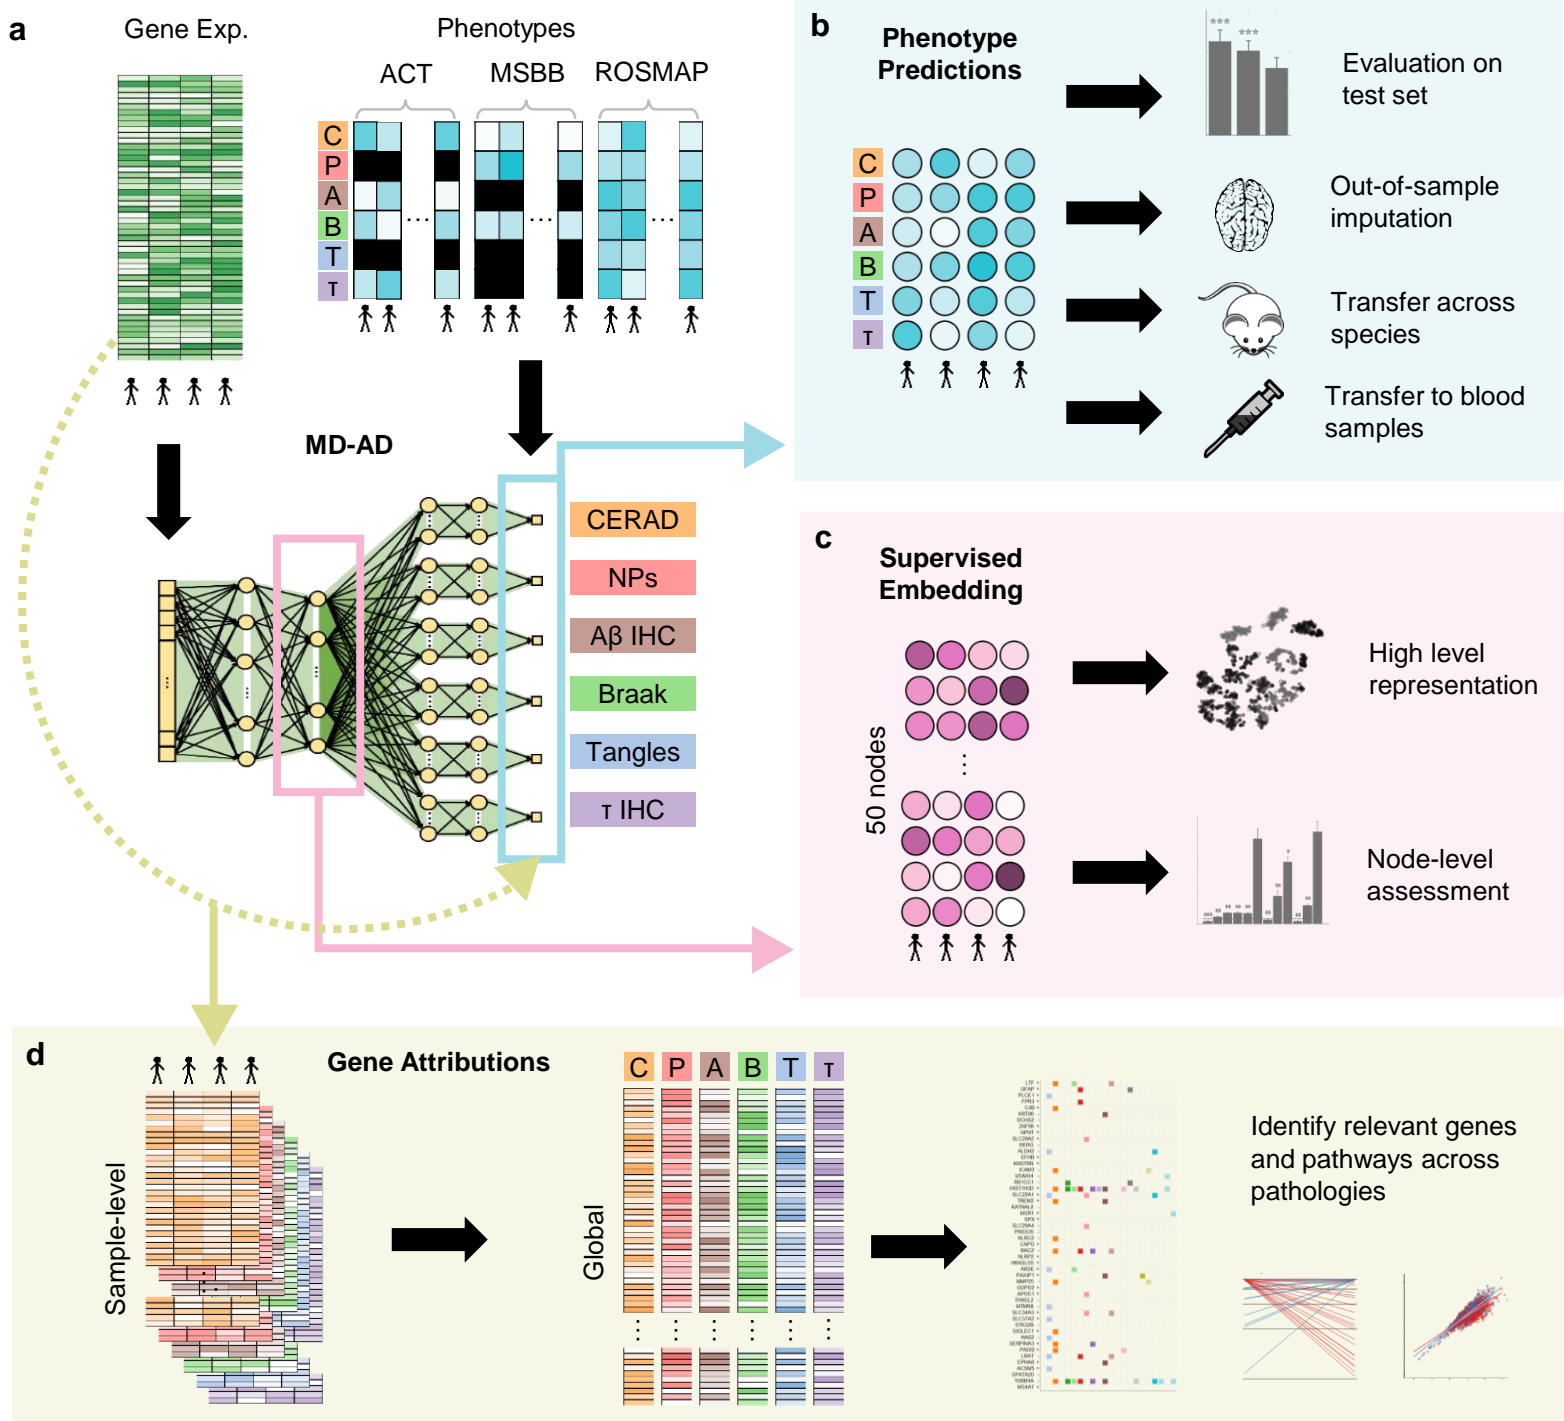

**e**

|        | # Expression Samples | CERAD | NPs | A $\beta$ IHC | Braak | Tangles | $\tau$ IHC |
|--------|----------------------|-------|-----|---------------|-------|---------|------------|
| ACT    | 337                  | ✓     |     | ✓             | ✓     |         | ✓          |
| MSBB   | 879                  | ✓     | ✓   |               | ✓     |         |            |
| ROSMAP | 524                  | ✓     | ✓   | ✓             | ✓     | ✓       | ✓          |

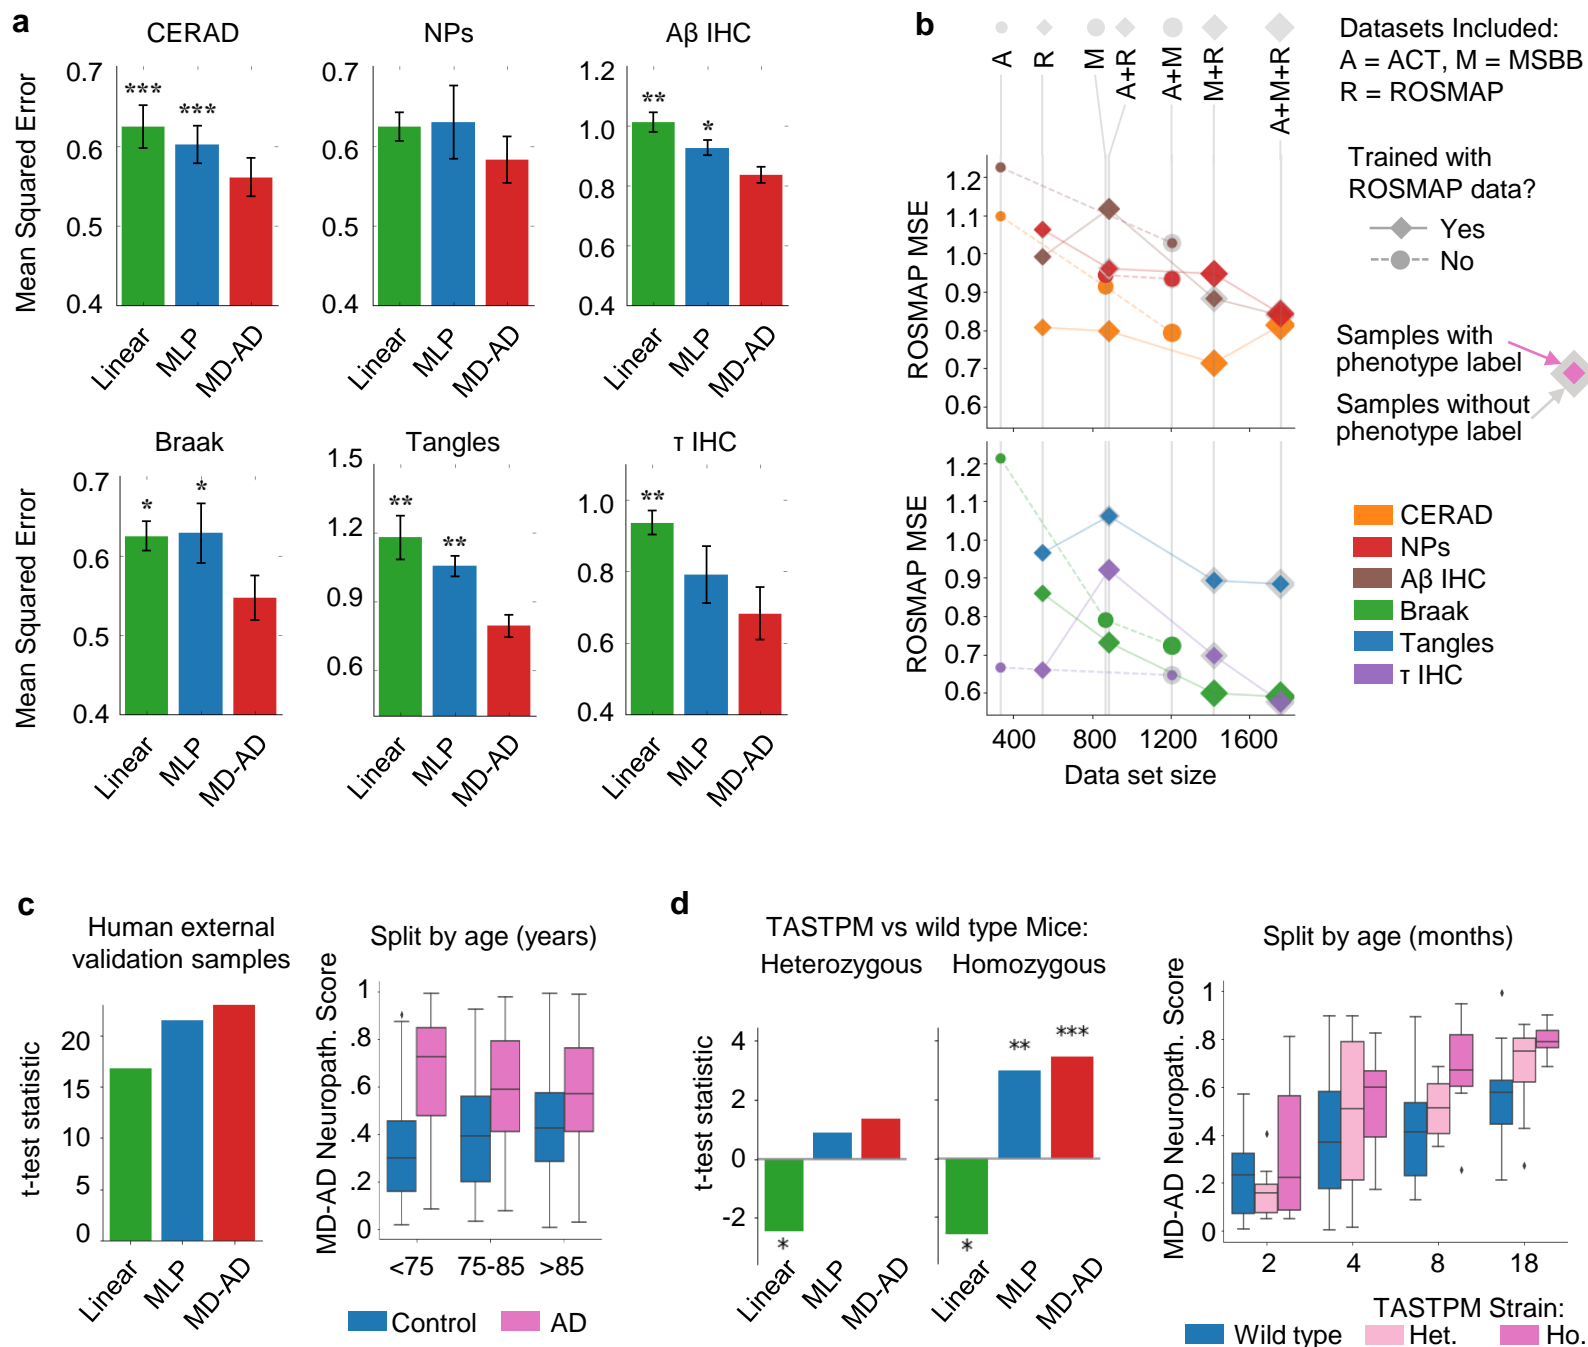



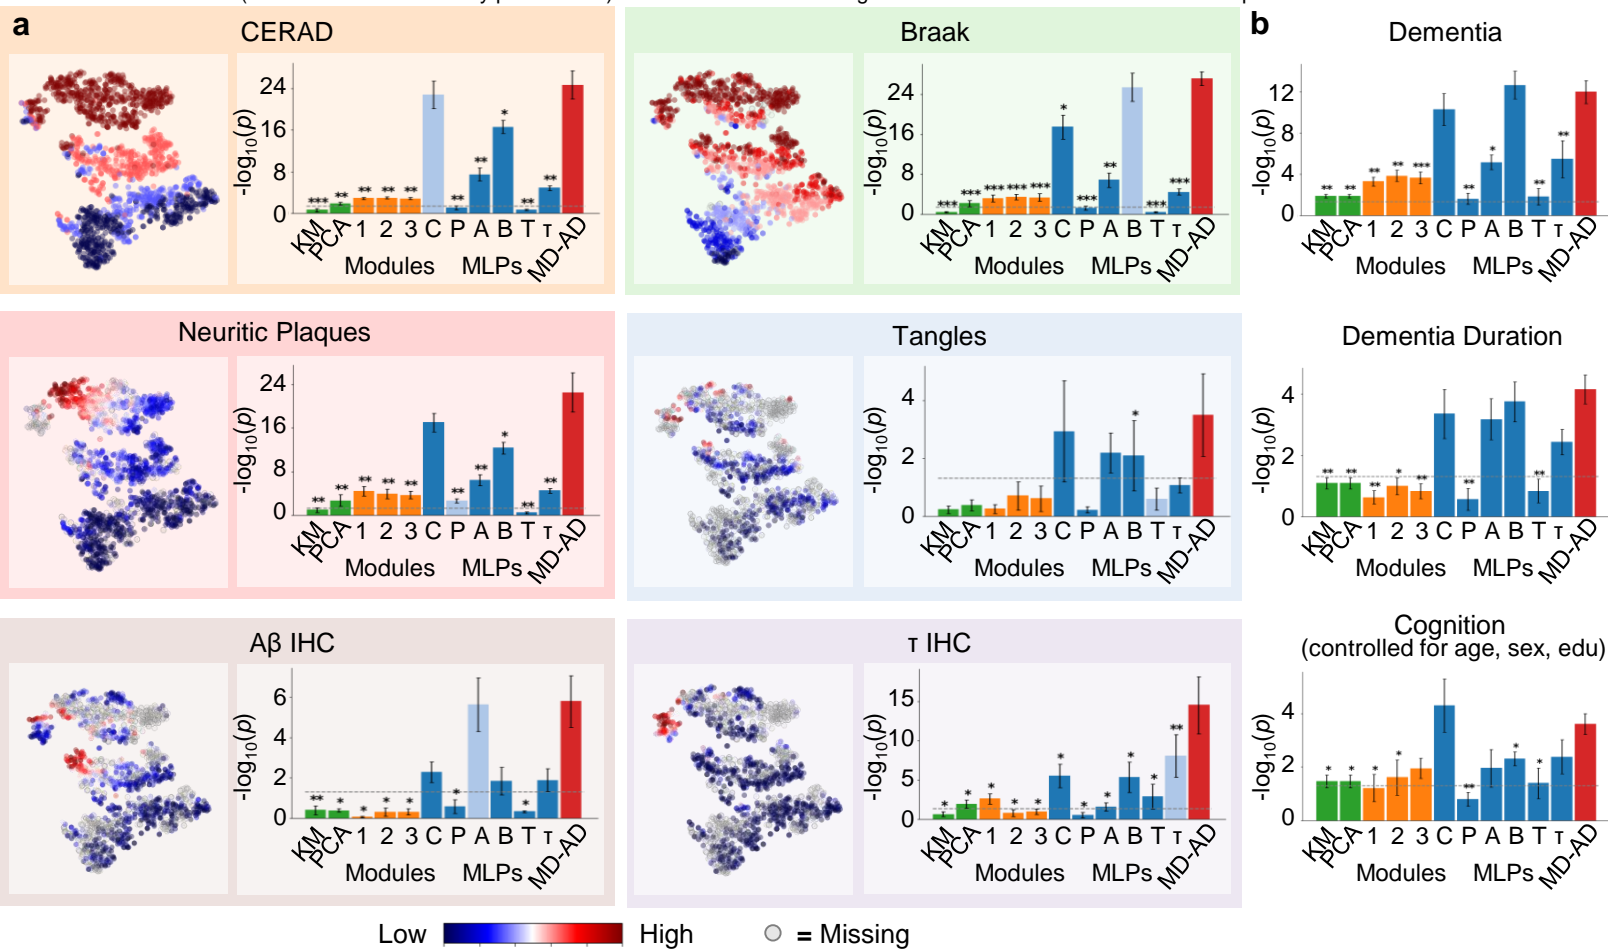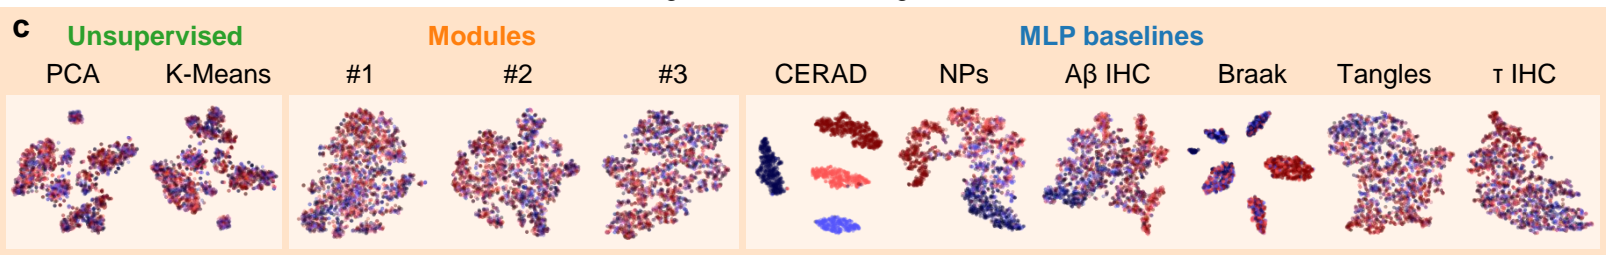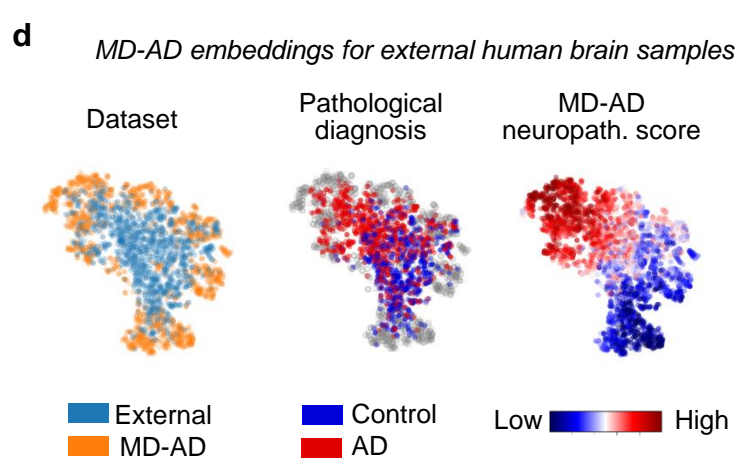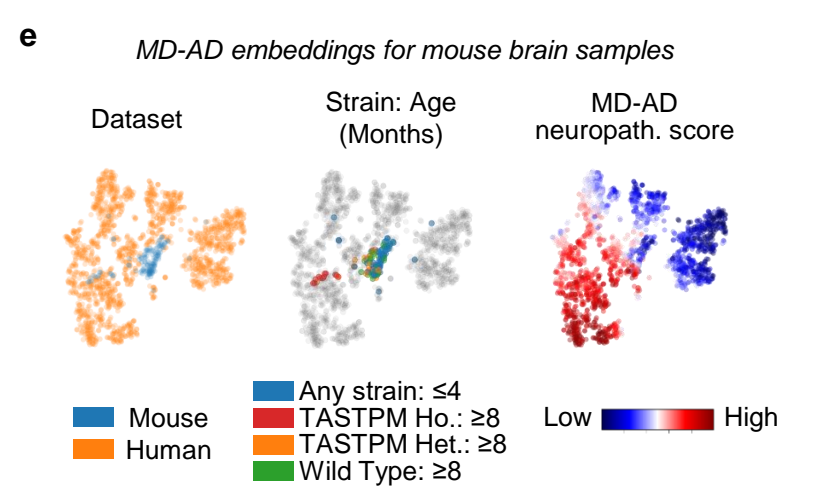

**Figure 4**

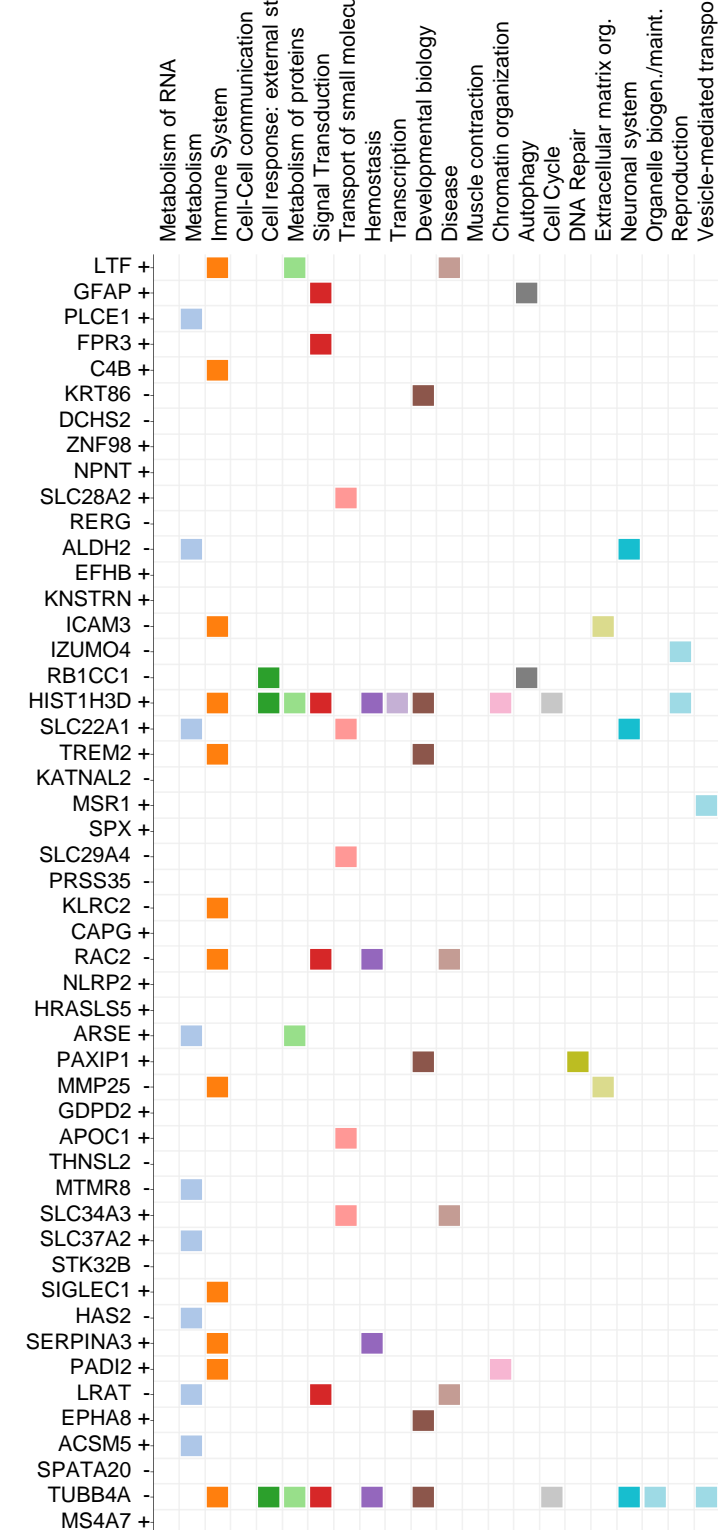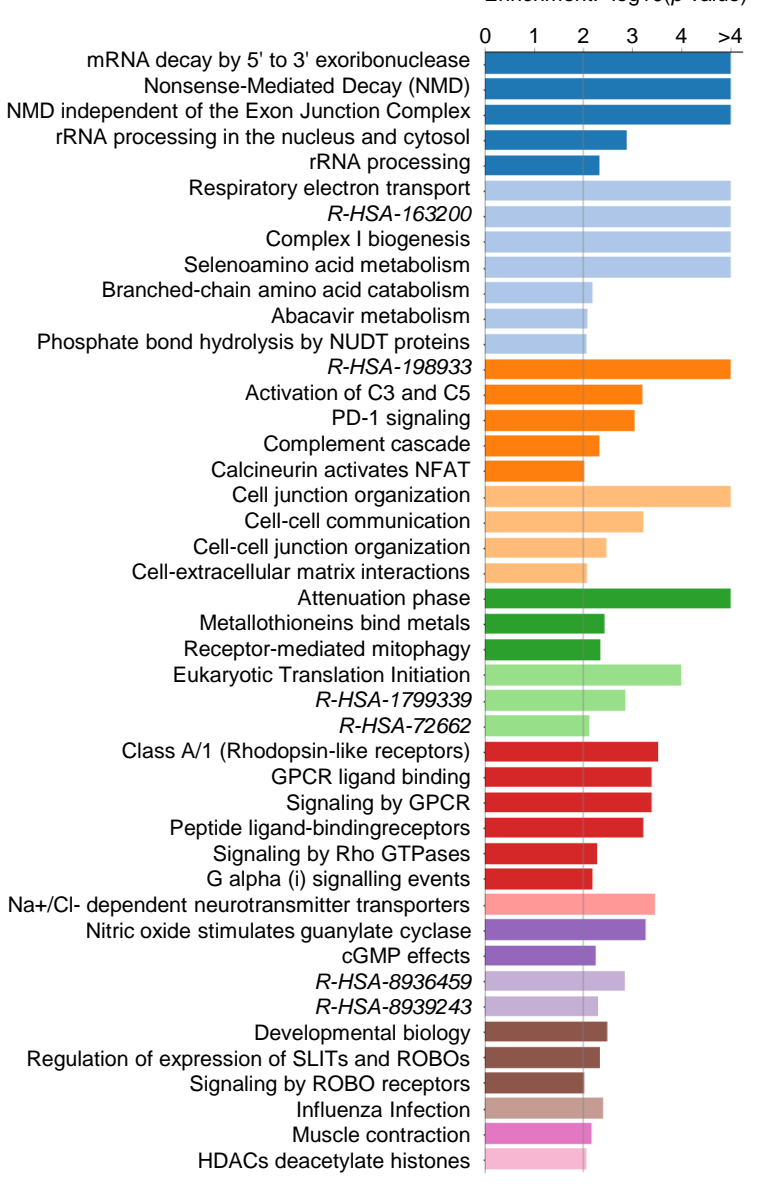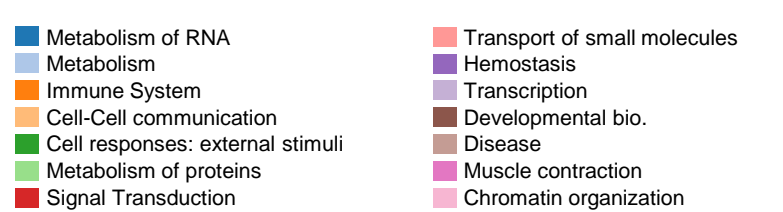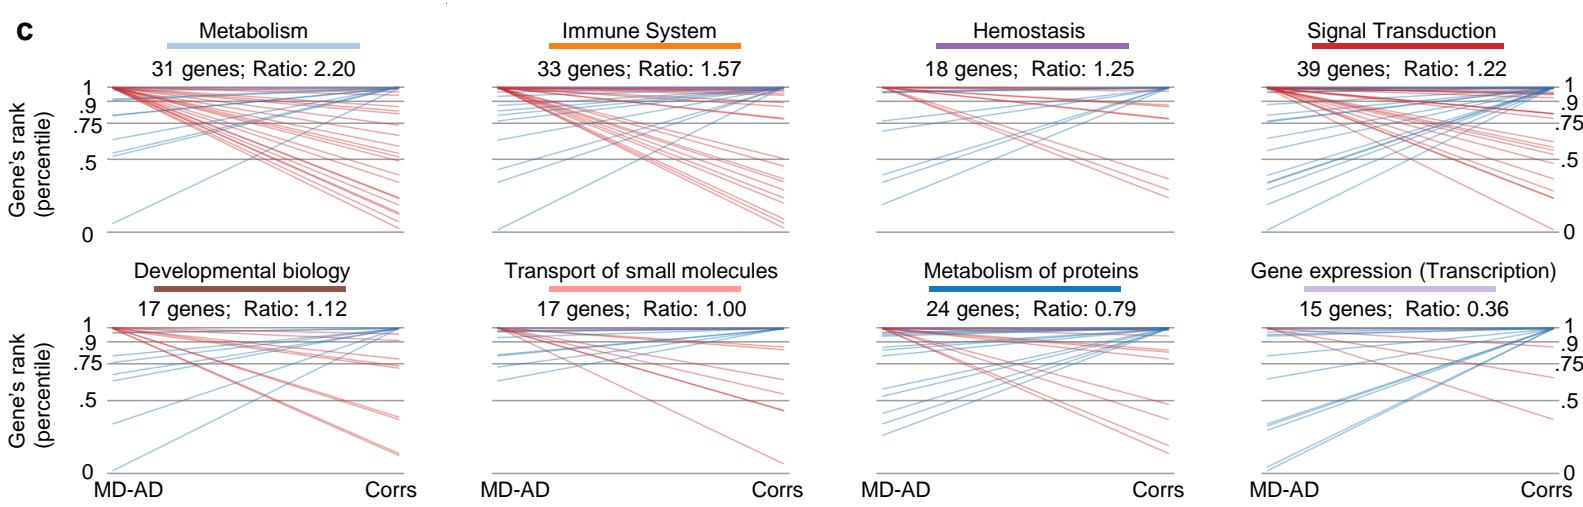

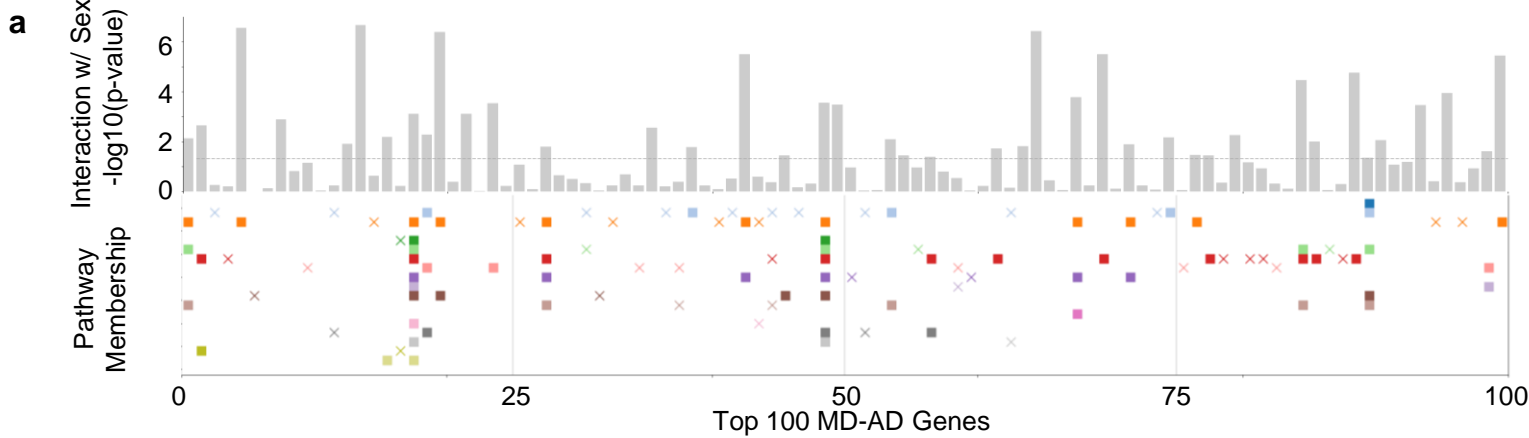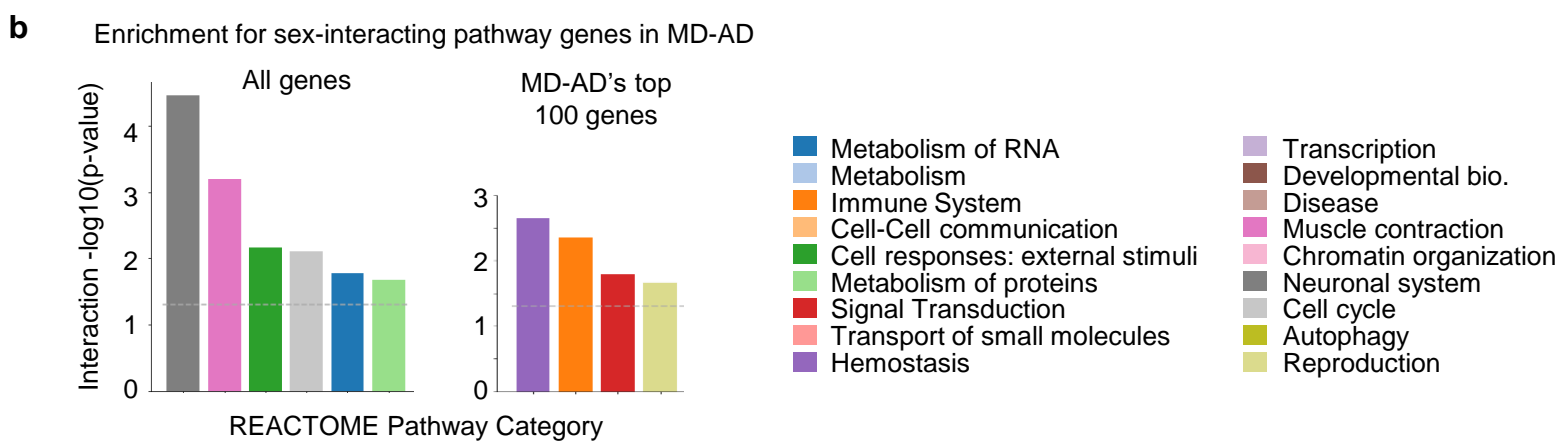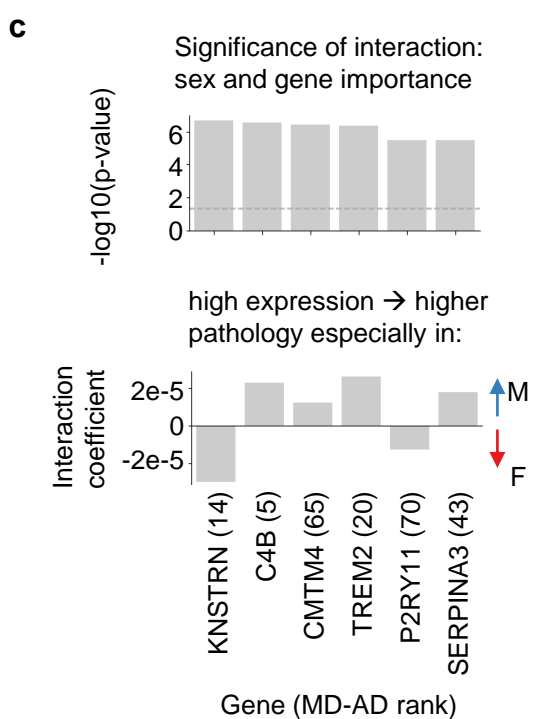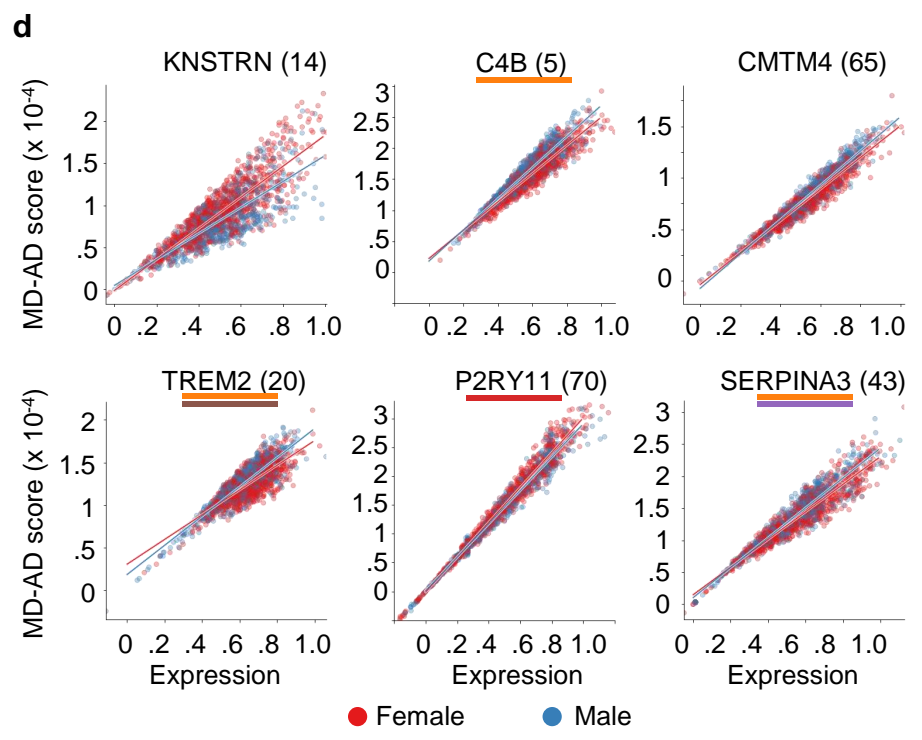

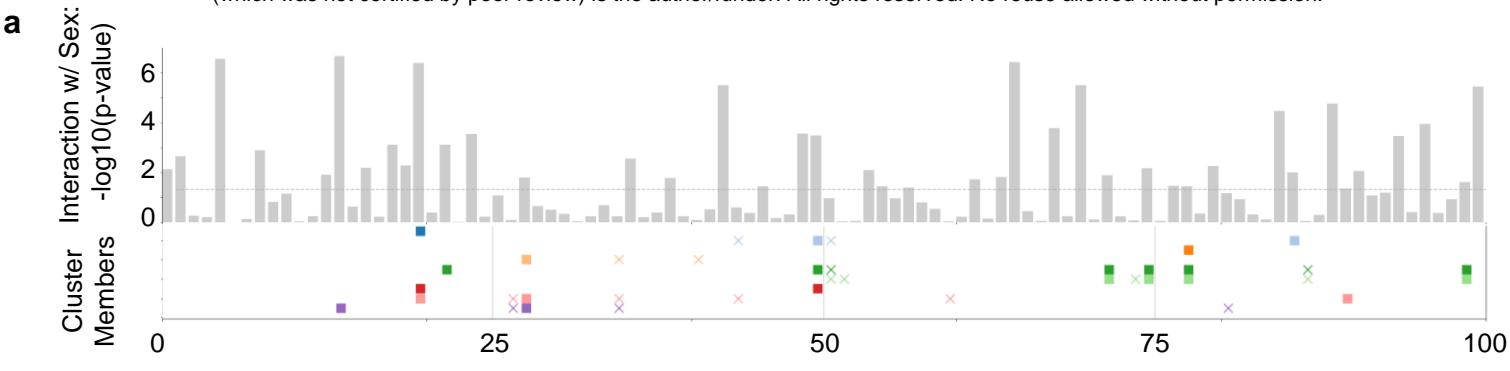

**b** Enrichment for sex-interacting microglial genes in MD-AD

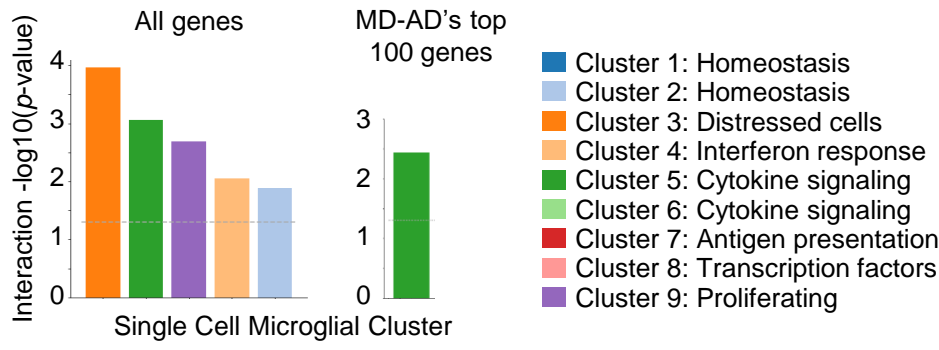

**c** MD-AD: Enrichment for cell-type signatures

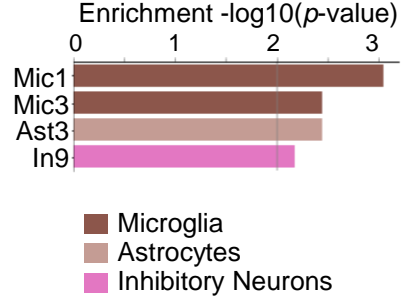

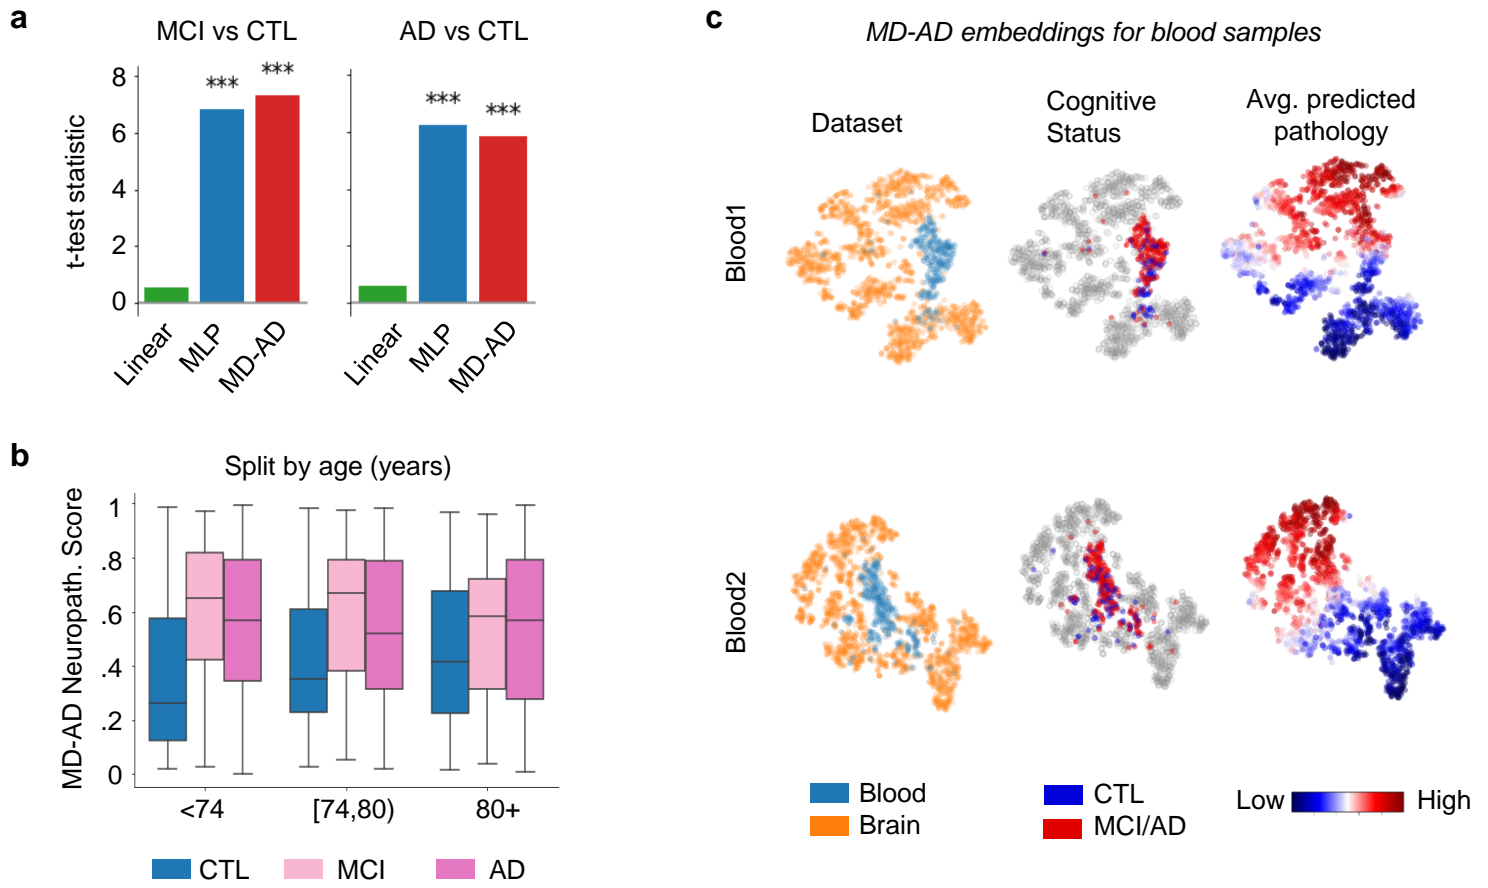

Source: https://biorxiv.org/content/10.1101/2020.11.30.404087v1.full.pdf
